# Supplementary material for: Genetic mechanisms of critical illness in COVID-19
Source: Springer Nature journal article supplement (doi:10.1038/s41586-020-03065-y), 2020-12-11
Supplement: 41586_2020_3065_MOESM1_ESM.pdf [file 41586_2020_3065_MOESM1_ESM.pdf]

---

**Supplementary information**

---

**Genetic mechanisms of critical illness in  
COVID-19**

---

In the format provided by the  
authors and unedited

Genetic mechanisms of critical illness in Covid-19 Supplementary  
Information

# Contents

|                                                          |           |
|----------------------------------------------------------|-----------|
| <b>GWAS details</b>                                      | <b>1</b>  |
| <b>Regions in detail</b>                                 | <b>4</b>  |
| <b>Demographics, recruitment and severity</b>            | <b>6</b>  |
| <b>Comorbidity</b>                                       | <b>9</b>  |
| <b>Matched controls</b>                                  | <b>11</b> |
| <b>Mendelian Randomisation</b>                           | <b>13</b> |
| <b>Transcriptome-wide association study</b>              | <b>16</b> |
| <b>Gene-level burden of significance</b>                 | <b>18</b> |
| <b>Heritability and high-definition likelihood (HDL)</b> | <b>19</b> |
| <b>Contributors</b>                                      | <b>22</b> |
| <b>References</b>                                        | <b>41</b> |

# GWAS details

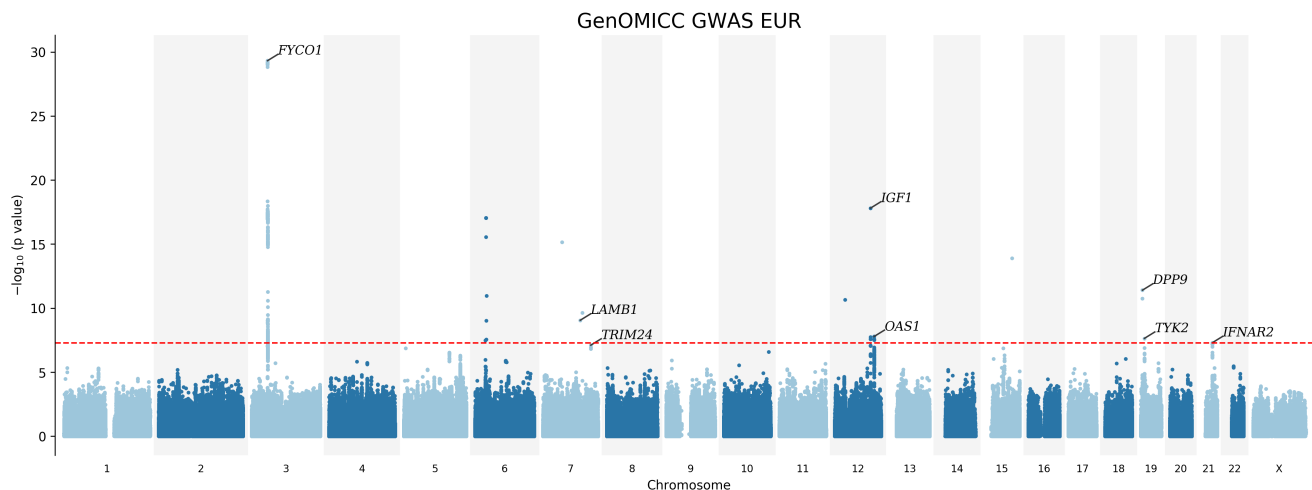

Supplementary Figure 1: Manhattan plot showing single nucleotide polymorphism (SNP)-level uncorrected p-values from GWAS analysis (before validation vs Generation Scotland and 100,000 genomes controls) in largest ancestry group, EUR (red horizontal line shows genome-wide significance at  $-\log_{10}(5 \times 10^{-8})$ )

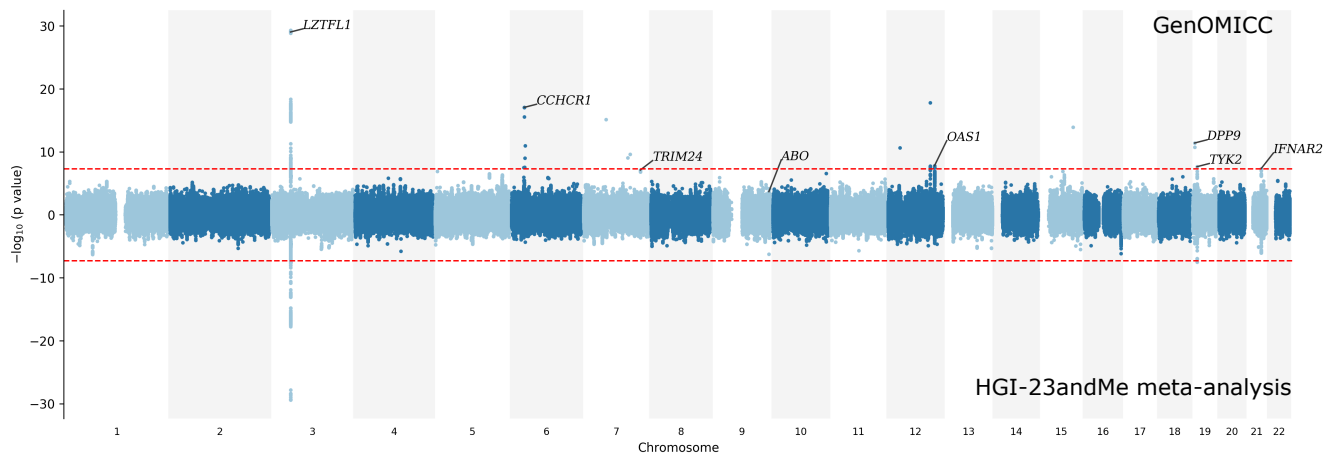

Supplementary Figure 2: Miami plot showing relationship between the EUR GenOMICC GWAS vs UK Biobank (before validation vs Generation Scotland and 100,000 genomes controls) and a restricted meta-analysis including only patients from the Covid-19 Host Genetics Initiative and 23andMe. Raw (uncorrected) p-values from GWAS analysis are shown. In upper (GenOMICC) panel, red horizontal line shows genome-wide significance for common variants at  $-\log_{10}(5 \times 10^{-8})$ ; in lower (meta-analysis) panel, red horizontal line shows a more stringent genome-wide significance threshold for meta-analysis variants at  $-\log_{10}(10^{-8})$

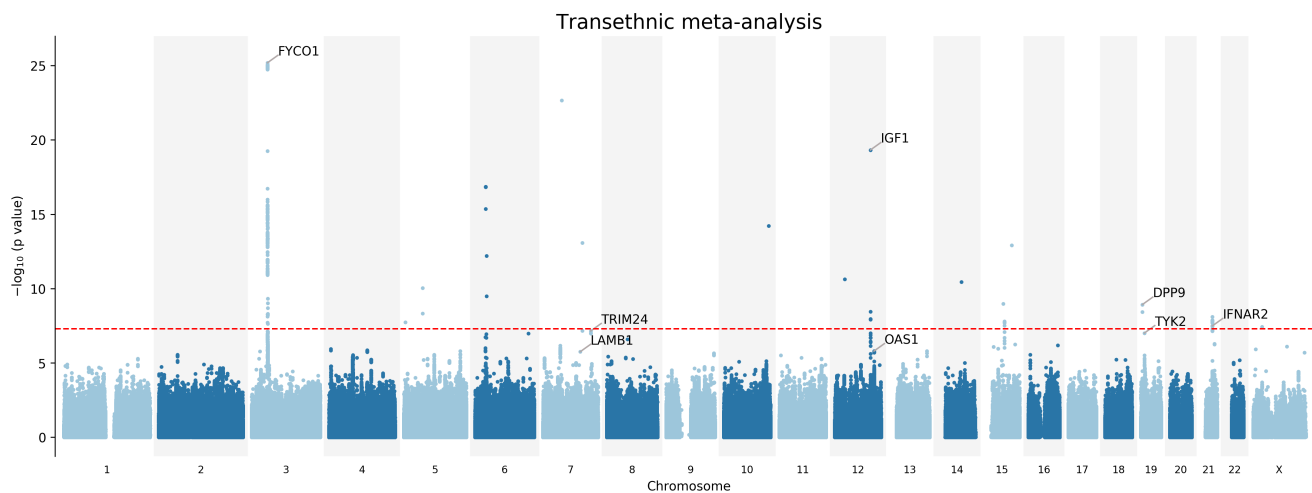

Supplementary Figure 3: Manhattan plot showing SNP-level p-values from trans-ethnic meta-analysis including European (EUR), African (AFR), East Asian (EAS), and South Asian (SAS) PCA-determined ancestry groups in GenOMICC. (red horizontal line shows genome-wide significance at  $-\log_{10}(5 \times 10^{-8})$ )

Supplementary Table 1: Lead variants from sex-specific genome-wide significant regions in GenOMICC European ancestry group. chr:pos - chromosome and position of the top SNP (build 37); Risk - risk allele; Other - other allele; RAF - risk allele frequency; OR - effect size (odds ratio) of the risk allele; locus - gene nearest to the top SNP.

| snps        | chr.pos.b37. | Risk | Other | RAF.male | OR.male | P.male  | RAF.female | OR.female | P.female |
|-------------|--------------|------|-------|----------|---------|---------|------------|-----------|----------|
| rs73064425  | 3:45901089   | T    | C     | 0.083    | 2.3     | 3.2e-28 | 0.083      | 2         | 1.3e-07  |
| rs143334143 | 6:31121426   | A    | G     | 0.076    | 1.9     | 4.7e-15 | 0.073      | 2.3       | 1.1e-09  |
| rs3131294   | 6:32180146   | G    | A     | 0.86     | 1.5     | 4.2e-08 | 0.86       | 1.5       | 0.00081  |

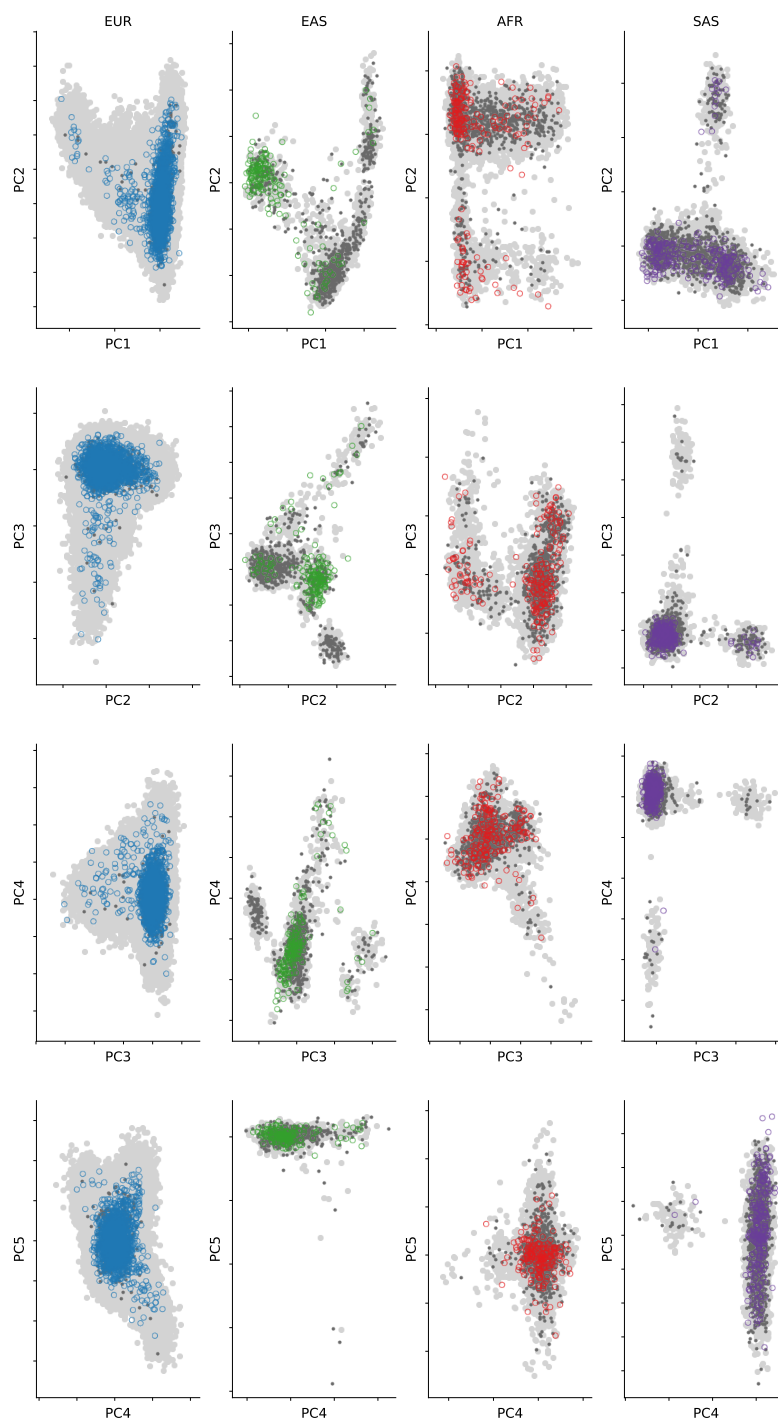

Supplementary Figure 4: PCA plots showing the distribution of all cases and controls for the first 5 principal components for each ancestry group. Cases are shown as coloured open circles: European (EUR, blue), African (AFR, red), East Asian (EAS, green), and South Asian (SAS, purple). Controls are dark grey closed circles. UK Biobank population background is shown as light grey closed circles.

# Regions in detail

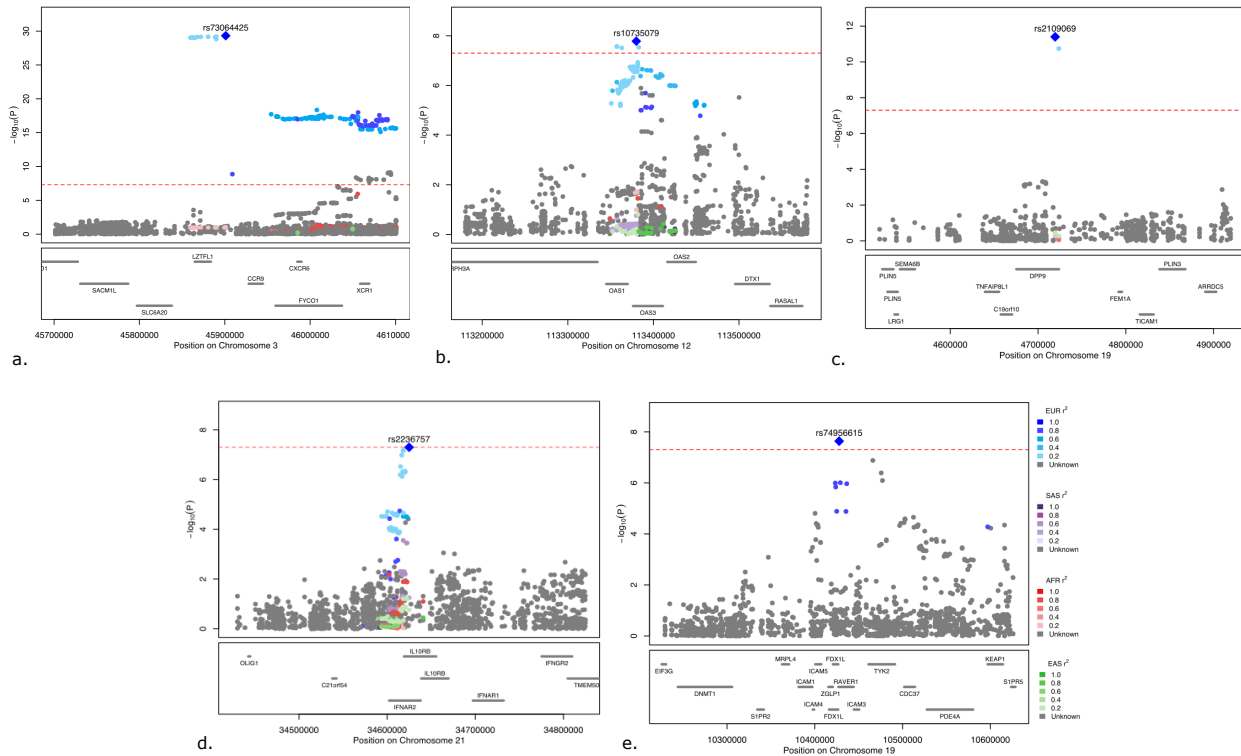

Supplementary Figure 5: Genomic region plots showing ancestry-specific p-values and LD structure. Each variant is plotted at the y-axis position for GWAS within a given ancestry group in GenOMICC vs UK Biobank analysis. A variant is plotted for an ancestry group only if it has MAF > 5% in that group in UK Biobank. Colour depicts genetic ancestry group (EUR = blue, EAS = green, AFR = red, SAS = purple); shading shows linkage disequilibrium value (LD,  $r^2$ ) within a given ancestry group with the lead SNP; variants with unknown LD for each ancestry group are shown in grey; lead SNP for EUR is shown in each plot as a blue diamond. LD reference is calculated using PLINK from 5 cases randomly selected unrelated matched-ethnicity subjects in UK Biobank.

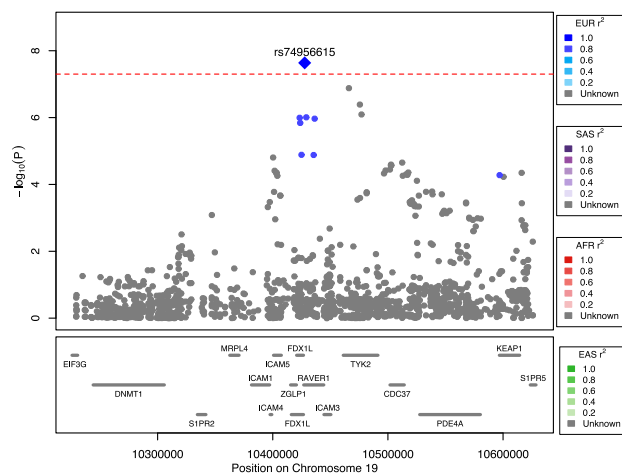

(a)

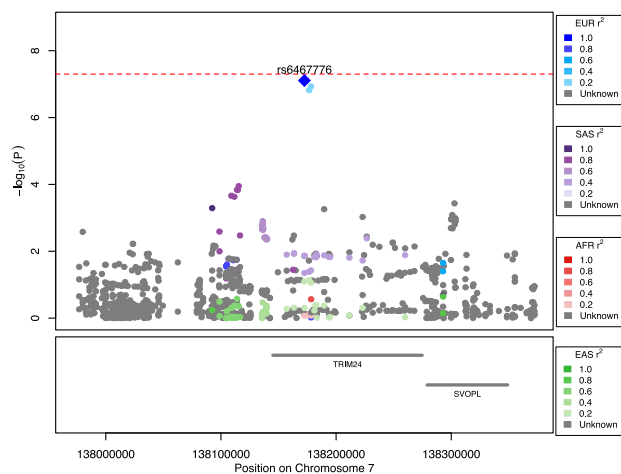

(b)

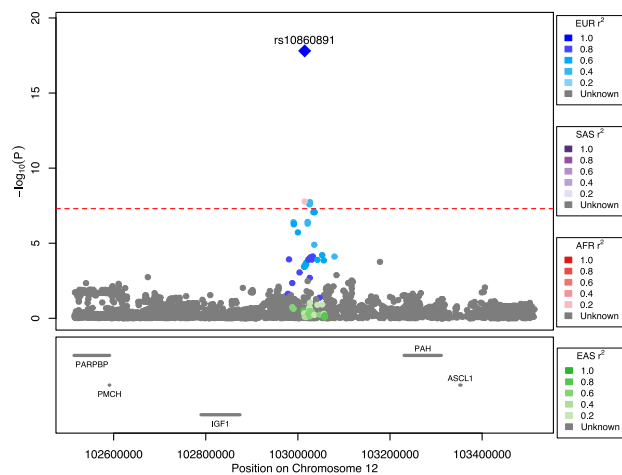

(c)

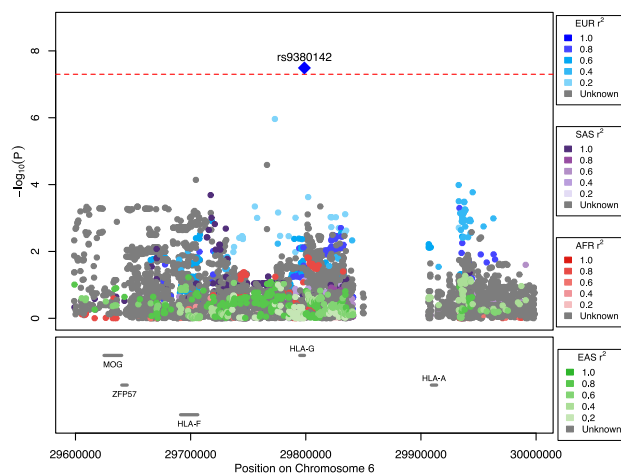

(d)

Supplementary Figure 6: Regional plots showing the TYK2, TRIM24, IGF1, and HLA loci. Red horizontal line shows genome-wide significance at  $-\log_{10}(5 \times 10^{-8})$ . Colour depicts linkage disequilibrium (LD,  $r^2$ ) with lead SNP (purple diamond) in each plot. LD reference is calculated using PLINK from 10,000 randomly-selected unrelated European subjects in UK Biobank.



# Demographics, recruitment and severity

Cases were broadly representative of the UK critically-ill population. For 1069 GenOMICC cases, matched clinical data could be obtained from the Intensive Care National Audit and Research Centre (ICNARC) Case Mix Programme (CMP), a national audit of critical care admission in England, Wales and Northern Ireland.

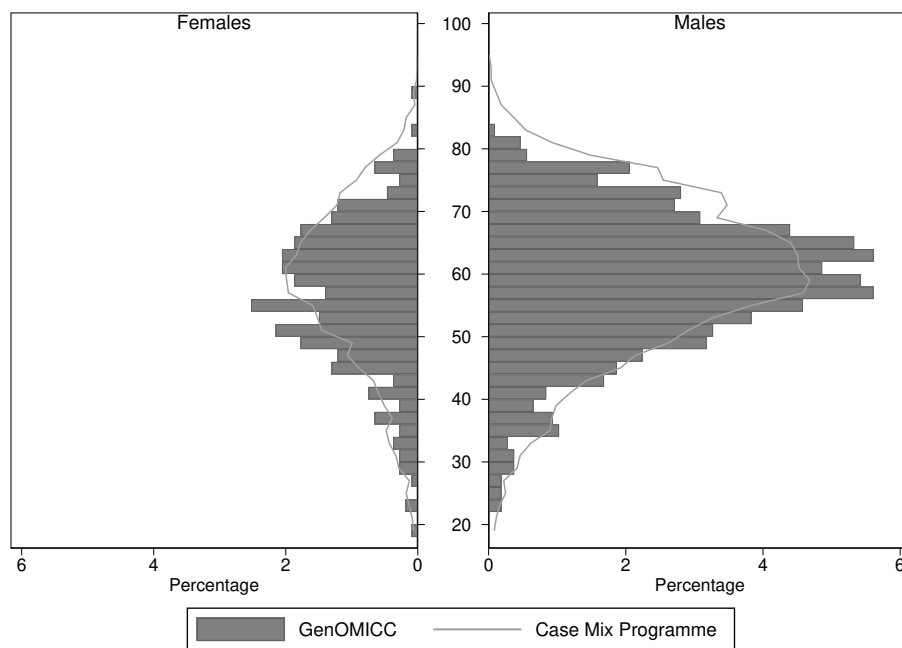

Supplementary Figure 7: Histogram showing age (in 2 year bins; first column shows lower end of band) and sex for 1069 patients recruited to GenOMICC for whom case mix programme data were available (bars), and all critically ill Covid-19 patients from the ICNARC Case Mix Programme (lines).

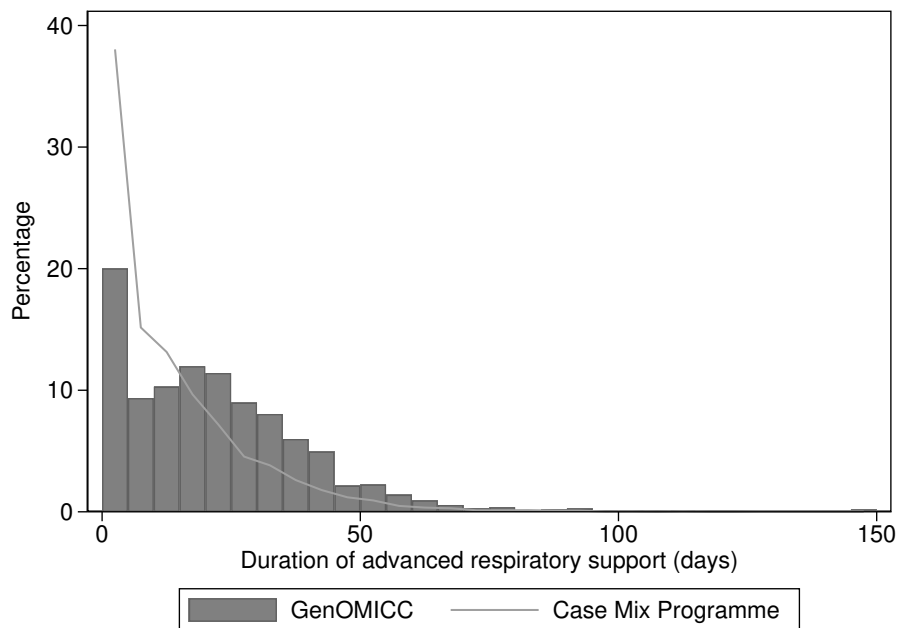

Supplementary Figure 8: Histogram showing duration of advanced respiratory support (invasive ventilation) for 1069 patients recruited to GenOMICC for whom case mix programme data were available (bars), and all critically ill Covid-19 patients from the ICNARC Case Mix Programme (lines). Patients who required a very short period of invasive ventilation are more likely to be discharged early from the ICU, and hence may have been disproportionately missed by the research teams from recruitment to GenOMICC.

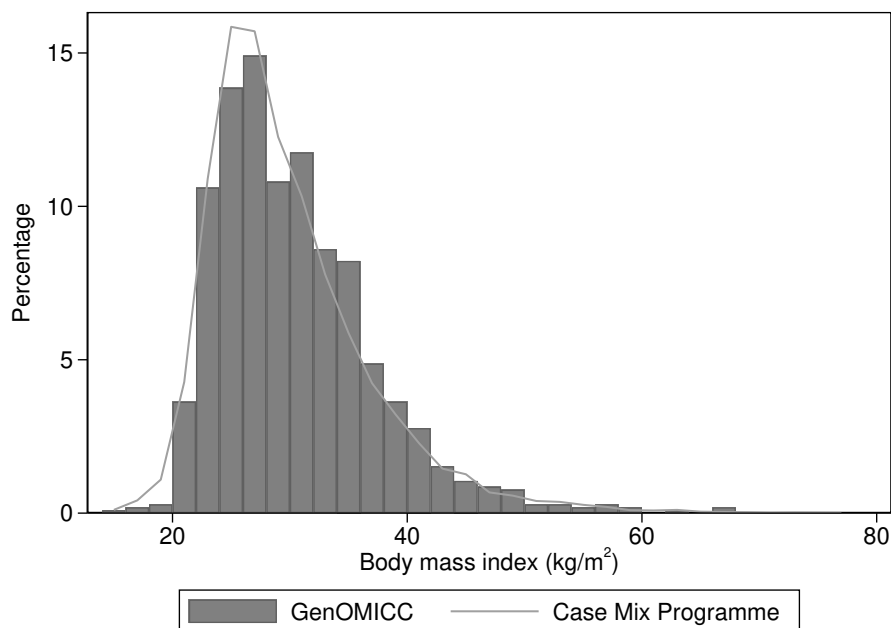

Supplementary Figure 9: Histogram showing body mass index (BMI, kg/m<sup>2</sup>; 2 kg/m<sup>2</sup> bands; first column shows lower end of band) for 1069 patients recruited to GenOMICC for whom case mix programme data were available (bars), and all critically ill Covid-19 patients from the ICNARC Case Mix Programme (lines).

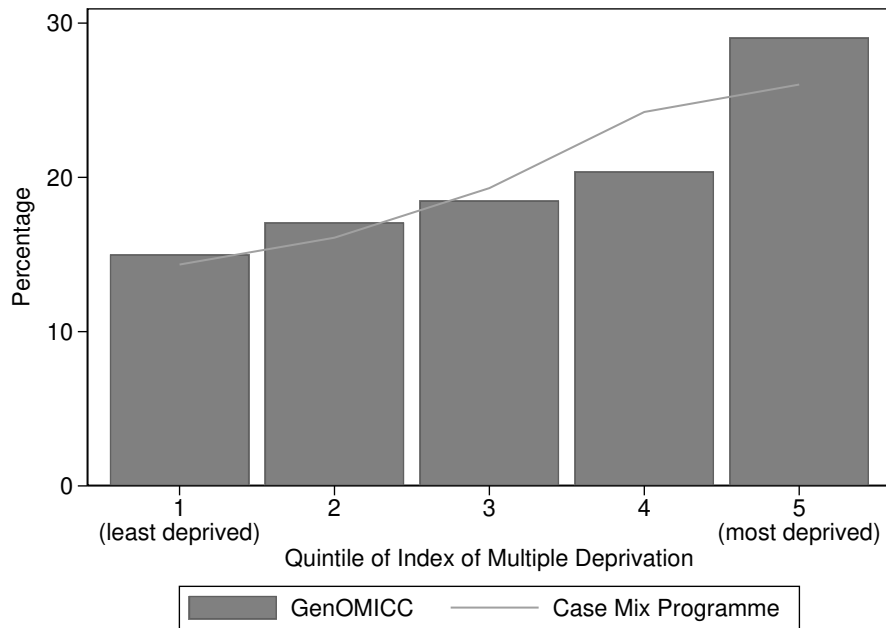

Supplementary Figure 10: Percentage of patients in Index of Multiple Deprivation 2019<sup>1</sup> quintiles (a government statistic measuring deprivation in small local units across the country). Data are shown for 1069 patients recruited to GenOMICC for whom case mix programme data were available (bars), and all critically ill Covid-19 patients from the ICNARC Case Mix Programme (lines).

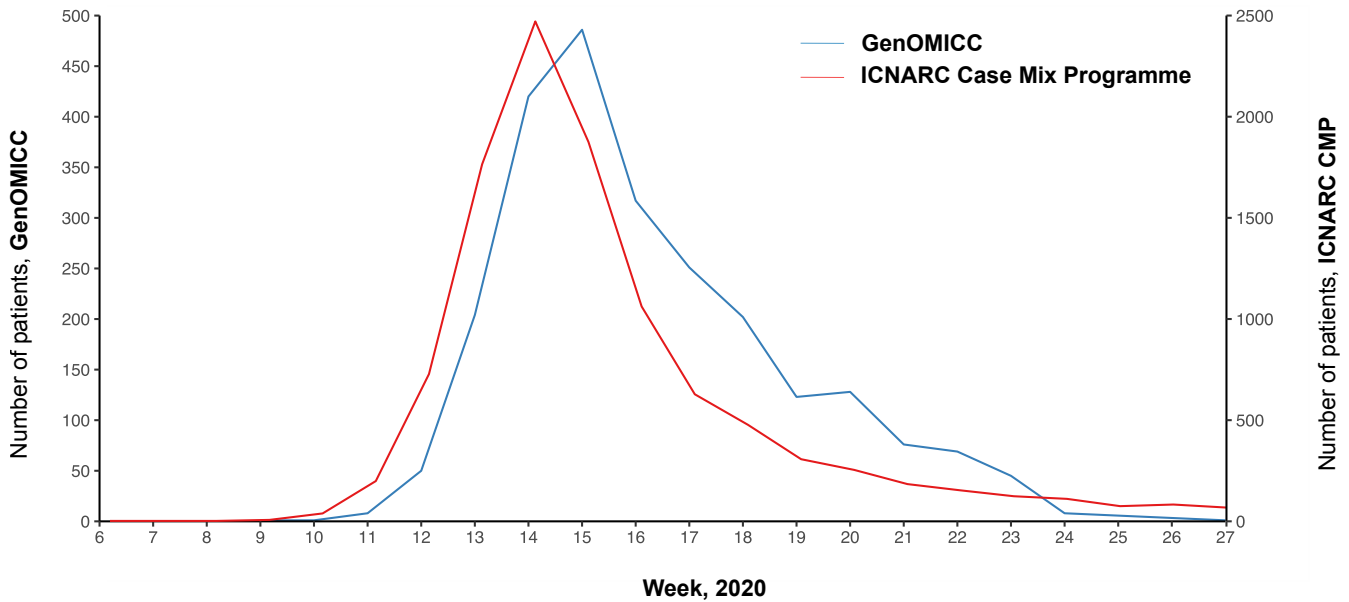

Supplementary Figure 11: Rate of recruitment showing the GenOMICC cases included in the current analysis (UK-wide), and the overall rate of ICU admissions with Covid-19 in the ICNARC Case Mix Programme (England, Wales and Northern Ireland only).

# Comorbidity

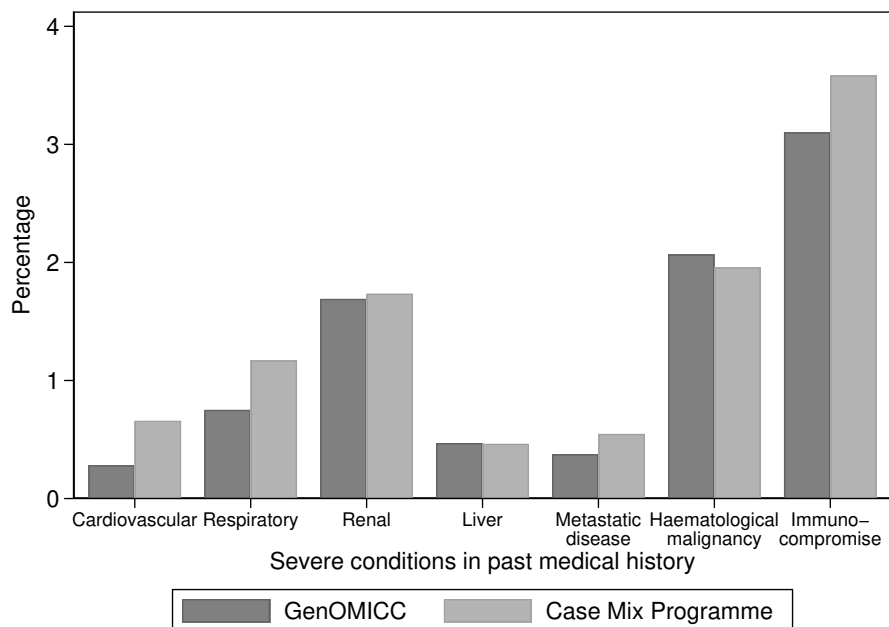

Supplementary Figure 12: Past medical history recorded for 1069 patients recruited to GenOMICC for whom case mix programme data were available (dark grey bars), and all critically ill Covid-19 patients from the ICNARC Case Mix Programme (light grey bars).

Supplementary Table 2: Comorbid illness in subsets of cases for whom detailed information are available. <sup>†</sup>n = number of participants with available data. \*The specific co-morbidities recorded, and how they were defined, differed between the Intensive Care National Audit & Research Centre (ICNARC) database (for GenOMICC participants) and the ISARIC4C database. ICNARC used more stringent definitions to capture “very severe” co-morbidities whereas ISARIC4C recorded any chronic disease affecting an organ system, even if less severe.

| Co-morbidity                           | <i>n</i> (%) | Definition*                                                                    |
|----------------------------------------|--------------|--------------------------------------------------------------------------------|
| <b>GenOMICC</b> (n=1064 <sup>†</sup> ) |              |                                                                                |
| Cardiovascular                         | 3 (0.3)      | Cardiovascular symptoms at rest                                                |
| Pulmonary                              | 8 (0.8)      | Dyspnoea with light activity or requires home ventilation                      |
| Renal                                  | 18 (1.7)     | Requires renal replacement therapy (RRT)                                       |
| Liver                                  | 5 (0.5)      | Liver cirrhosis (biopsy-proven), portal hypertension or hepatic encephalopathy |

| Co-morbidity                          | <i>n</i> (%) | Definition*                                                 |
|---------------------------------------|--------------|-------------------------------------------------------------|
| Malignant neoplasm                    | 4 (0.4)      | Malignant neoplasm with distant metastases                  |
| Haematologic neoplasm                 | 22 (2.1)     | Leukaemia, lymphoma or multiple myeloma                     |
| Immunocompromise                      | 33 (3.1)     | Acquired (iatrogenic, HIV/AIDS) or congenital               |
| <b>ISARIC4C</b> (n=108 <sup>†</sup> ) |              |                                                             |
| Cardiovascular                        | 31 (28.7)    | Chronic heart disease (excluding hypertension)              |
| Pulmonary                             | 9 (8.3)      | Chronic lung disease (excluding asthma)                     |
| Renal                                 | 8 (7.4)      | Chronic kidney disease, irrespective of requirement for RRT |
| Liver                                 | 0 (0)        | Moderate or severe liver disease                            |
| Malignant neoplasm                    | 6 (5.6)      | Local or metastatic neoplasm                                |
| Haematologic disease                  | 0 (0)        | Chronic haematologic disease of any aetiology               |

# Matched controls

Because of the evidence of residual inflation in the GenOMICC EUR UK Biobank analysis (Supplementary Figure ??), and the genetic correlations with obesity and educational attainment (Supplementary Figure 19a), we undertook further analysis to examine the effect of additional correction for population structure. We performed a GWAS in which we restricted the analysis to cases for whom UK Biobank controls could be identified according to the following rules:

- individual matches by ancestry, sex, age, and deprivation quintile
- BMI sampled from a distribution that parallels the ICNARC CMP BMI distribution for the GenOMICC cases (Supplementary Figure 9)

Applying these rules produced a smaller comparison than the primary analysis:  $n_{\text{cases}} = 1260$ ;  $n_{\text{controls}} = 6300$ .

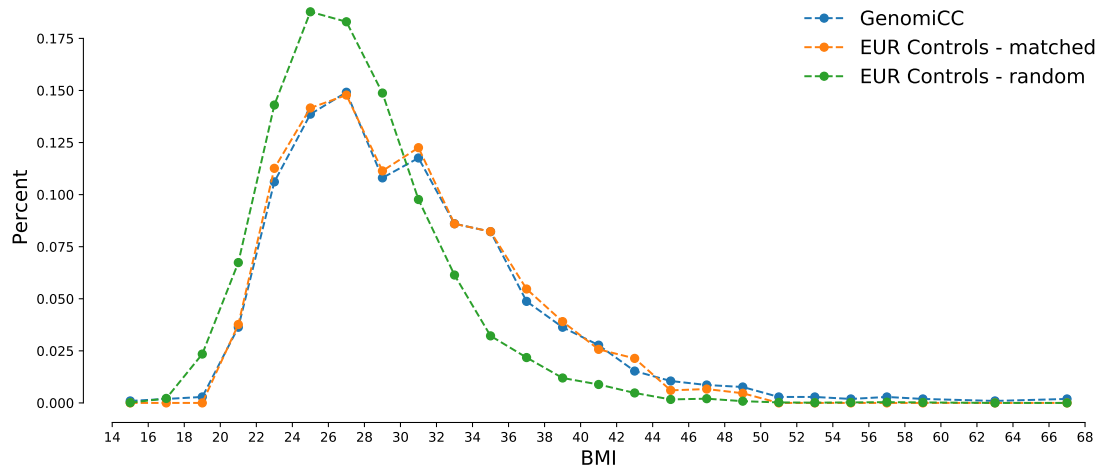

Supplementary Figure 13: Distribution of body mass index (BMI, kg/m<sup>2</sup>; 2 kg/m<sup>2</sup> bands) for GenOMICCcases (blue), UK Biobank random controls (primary analysis, green) and UK Biobank BMI-matched controls (orange)

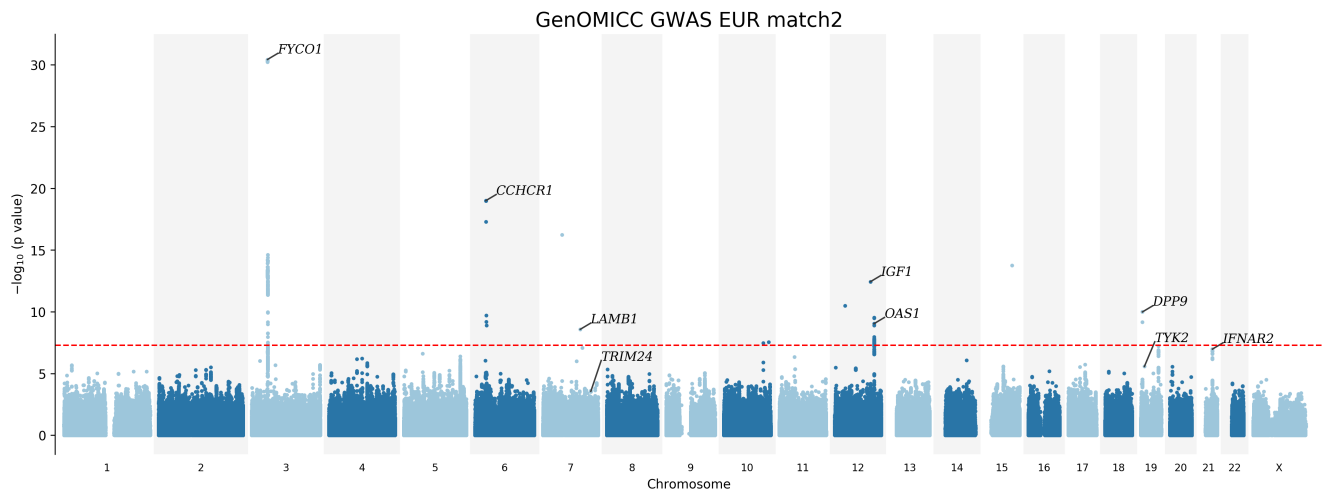

**Effect comparison gcc.eur.match2 vs gcc.eur**

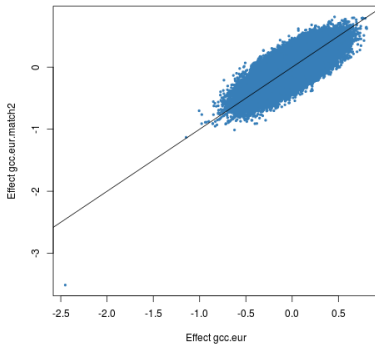

(b)

**P val comparison gcc.eur.match2 vs gcc.eur**

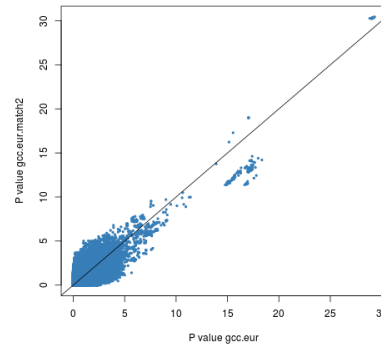

(c)

**QQ Plot gcc.eur.match2**

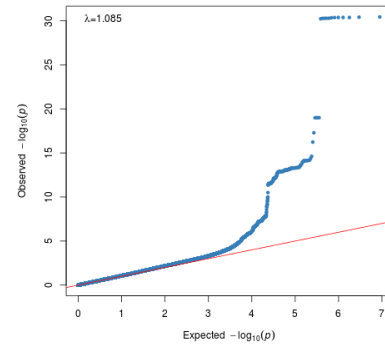

(d)

Supplementary Figure 14: Results from secondary analysis with matched controls. (a) Manhattan plot showing raw (uncorrected) single nucleotide polymorphism (SNP)-level p-values for genome-wide significant associations (red horizontal line shows genome-wide significance at  $-\log_{10}(5 \times 10^{-8})$ ). (b) Correlation with primary analysis in effect sizes ( $\beta$ ), and raw p-values (c). (d) QQ plot of raw (uncorrected) p-values.

# Mendelian Randomisation

Supplementary Table 3: *a priori* core set genes that are potentially directly informative for prioritisation of drugs in trials. MOA - mechanism of action. MAIC - meta-analysis by information content.

| Gene symbol | Rationale                                                                    |
|-------------|------------------------------------------------------------------------------|
| ACE2        | Core viral entry mechanism                                                   |
| TMPRSS2     | Core viral entry mechanism                                                   |
| CTSL        | Core viral entry mechanism                                                   |
| IL1A        | MOA anakinra, MAIC top hit 2020-9-1 <sup>2</sup>                             |
| IL1B        | MOA anakinra                                                                 |
| IL1R1       | MOA anakinra                                                                 |
| IL1R2       | MOA anakinra                                                                 |
| IL6         | MOA tocilizumab/sarilumab                                                    |
| IL6R        | MOA tocilizumab/sarilumab                                                    |
| CSF1        | MAIC Covid 2020-9-1 <sup>2</sup> , Differential levels in severe/fatal cases |
| CSF2        | MOA mavrilimumab, <sup>3</sup> other monoclonal ABs <sup>4</sup>             |
| CSF3        | MAIC Covid 2020-9-1 <sup>2</sup> , Differential levels in severe/fatal cases |
| PPIA        | MAIC Covid 2020-9-1 <sup>2</sup> , MOA cyclophilin inhibitors <sup>5</sup>   |
| IFNA1       | MOA interferon $\alpha$                                                      |
| IFNB1       | MOA interferon $\beta$                                                       |
| IFNAR1      | MOA interferon $\alpha/\beta$                                                |
| IFNAR2      | MOA interferon $\alpha/\beta$ , MAIC Influenza <sup>6</sup>                  |
| IFNG        | MOA interferon $\gamma$ , MAIC Covid 2020-9-1 <sup>2</sup>                   |
| IFNGR1      | MOA interferon $\gamma$ , MAIC Influenza <sup>6</sup>                        |
| IFNGR2      | MOA interferon $\gamma$                                                      |
| FCGR1A      | MOA fostamatinib                                                             |
| SYK         | MOA fostamatinib                                                             |
| JAK1        | MOA baricitinib/ruxolitinib                                                  |
| JAK2        | MOA baricitinib/ruxolitinib                                                  |
| TNF         | MOA anti-TNF drugs (e.g. infliximab, etanercept)                             |
| BTK         | MOA Bruton's tyrosine kinase inhibitors (e.g. acalabrutinib)                 |

Supplementary Table 4: Mendelian randomisation of gene expression of genes selected *a priori* as potential therapeutic targets for COVID-19. Gene: gene name; SNPchr: chromosome (GRCh37) of the SNP used as the instrumental variable; SNPpos: position (GRCh37) of the SNP; ALT: GRCh37 alternate allele; REF: GRCh37 reference allele; b\_SMR: Mendelian Randomisation effect-size estimate; p\_SMR: p-value of the Mendelian Randomisation effect-size estimate; p\_HEIDI: p-value of the HEIDI test; nsnp\_HEIDI: number of SNPs used in the calculation of p\_HEIDI; † is Bonferroni significant.

| Gene          | SNPchr | SNPpos    | ALT | REF | b_SMR  | p_SMR               | p_HEIDI | nsnp_HEIDI |
|---------------|--------|-----------|-----|-----|--------|---------------------|---------|------------|
| <i>IFNAR2</i> | 21     | 34610487  | C   | T   | -1.491 | 0.0043 <sup>†</sup> | 0.0150  | 6          |
| <i>IFNAR1</i> | 21     | 34670914  | T   | A   | -0.782 | 0.0341              | 0.1984  | 10         |
| <i>IL6R</i>   | 1      | 154405058 | G   | T   | 0.839  | 0.0362              | 0.1937  | 6          |



| Gene          | SNPchr | SNPpos   | ALT | REF | b_SMR  | p_SMR  | p_HEIDI | nsnp_HEIDI |
|---------------|--------|----------|-----|-----|--------|--------|---------|------------|
| <i>JAK1</i>   | 1      | 65513680 | T   | C   | 0.360  | 0.4199 | 0.1094  | 6          |
| <i>CTSL</i>   | 9      | 90355073 | A   | G   | -0.196 | 0.5021 | 0.6468  | 3          |
| <i>IFNGR2</i> | 21     | 34782395 | C   | A   | -0.231 | 0.5037 | 0.9570  | 14         |
| <i>CSF3</i>   | 17     | 39156499 | G   | A   | 0.012  | 0.9629 | -       | -          |

Supplementary Table 5: External replication (using Covid-19 HGI, UK Biobank excluded, and eQTLgen) of 9 genes with suggestive Mendelian randomisation associations from genome-wide analysis in GenOMICC (4,614 unique Ensembl gene IDs included in original analysis, genes selected had MR  $p < 0.05/9$  and HEIDI  $p > 0.05$ ). Gene: gene name; SNPchr: chromosome (GRCh37) of the SNP used as the instrumental variable; SNPpos: position (GRCh37) of the SNP; ALT: GRCh37 alternate allele; REF: GRCh37 reference allele; dir\_SMR: direction of effect of the Mendelian Randomisation effect-size estimate; p\_SMR: p-value of the Mendelian Randomisation effect-size estimate. <sup>†</sup> is Bonferroni significant.

| Gene           | SNPchr | SNPpos    | ALT | REF | dir_SMR | p_SMR                 |
|----------------|--------|-----------|-----|-----|---------|-----------------------|
| <i>TYK2</i>    | 19     | 10466123  | T   | C   | +       | 5.53E-05 <sup>†</sup> |
| <i>IGSF9B</i>  | 11     | 133812299 | C   | T   | +       | 1.90E-01              |
| <i>CCDC28A</i> | 6      | 139085617 | G   | C   | +       | 2.69E-01              |
| <i>ORMDL3</i>  | 17     | 38073968  | C   | G   | -       | 3.85E-01              |
| <i>GNLY</i>    | 2      | 85934499  | A   | C   | -       | 6.99E-01              |
| <i>S100A13</i> | 1      | 153673034 | G   | A   | -       | 7.04E-01              |
| <i>MMP25</i>   | 16     | 3099335   | A   | G   | -       | 7.84E-01              |
| <i>TOMM7</i>   | 7      | 22860474  | A   | G   | +       | 9.10E-01              |
| <i>TNFSF15</i> | 9      | 117579457 | A   | G   | NA      | NA                    |

In order to further validate the key Mendelian randomisation findings, generalized summary-data Mendelian randomisation (GSMR)<sup>7</sup> was performed using multiple quasi-independent SNPs for TYK2 and IFNAR2 (Methods). Using data from eQTLgen<sup>8</sup>, 8 and 13 quasi-independent SNPs after HEIDI-outlier filtering test were identified for each gene respectively. The GSMR results replicated the SMR results, with both a consistent direction of effect and a significant p-value in both cases (Supplementary Table 6, Supplementary Figure 15).

Supplementary Table 6: Results of GSMR analysis using GenOMICC GWAS EUR as outcome, for IFNAR2 and TYK2.  $\beta_{xy}$  - effect size; se - standard error for  $\beta_{xy}$ ; p - Mendelian randomisation p-value; nsnp - number of SNPs included. {#tbl:mr.cojo}

| Exposure | $\beta_{xy}$ | se       | p        | nsnp |
|----------|--------------|----------|----------|------|
| IFNAR2   | -0.307834    | 0.115121 | 0.0075   | 13   |
| TYK2     | 0.74874      | 0.168939 | 9.33e-06 | 8    |

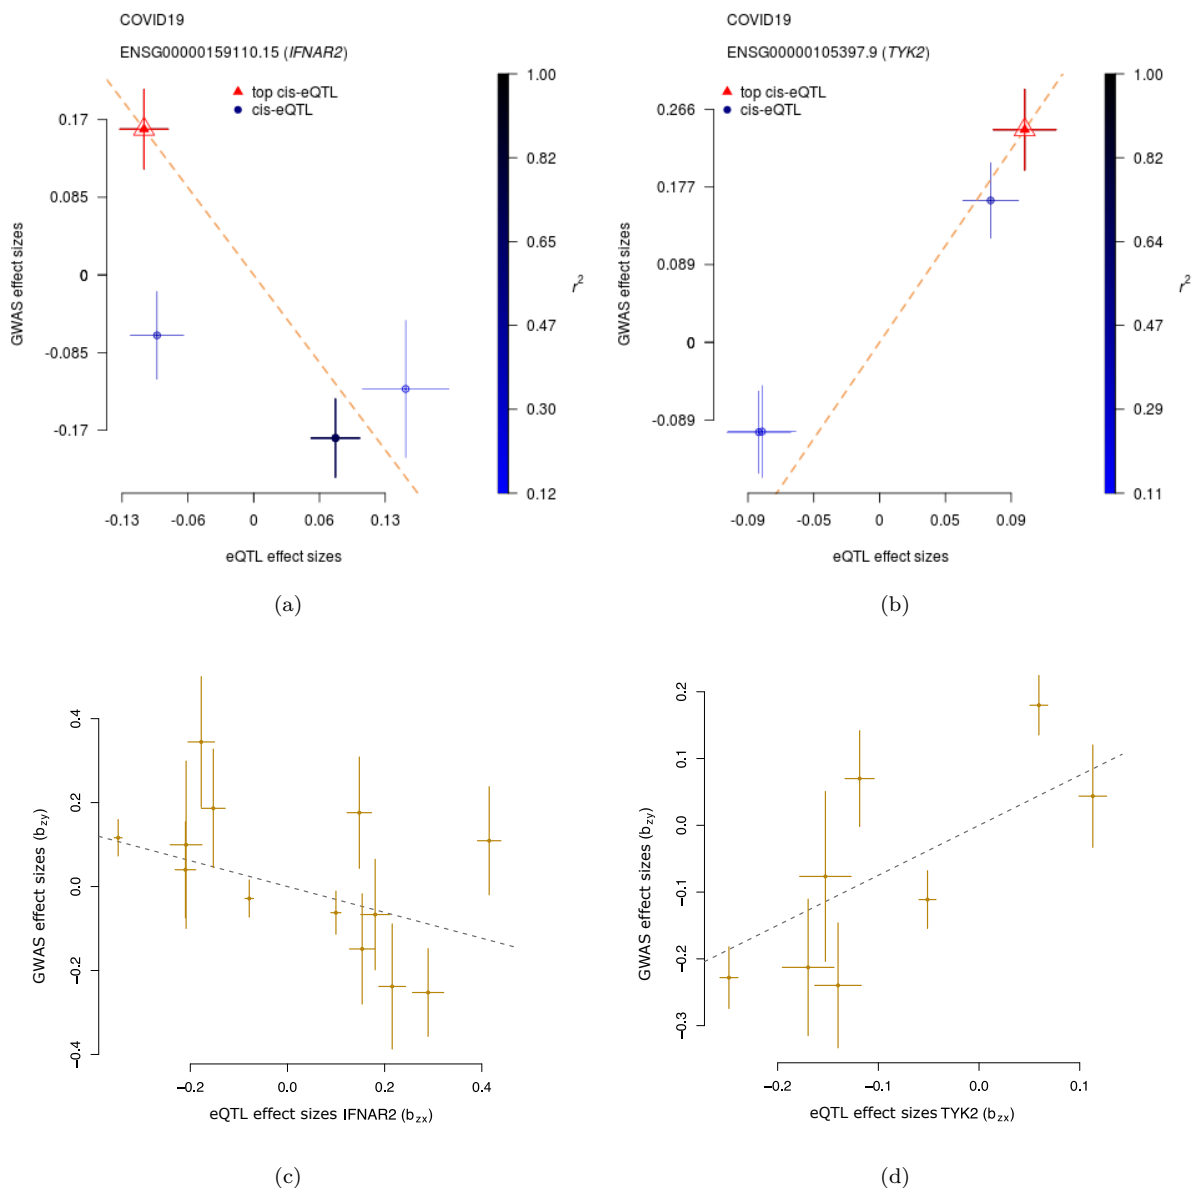

Supplementary Figure 15: Exposure and outcome effect-size estimate ( $\beta_{exposure}$  vs  $\beta_{outcome}$ ) plots for *IFNAR2* (a,c) and *TYK2* (b,d). (a,b): SNPs included in the HEIDI tests for *IFNAR2* and *TYK2* using exposure data from GTEx v7 Whole Blood and outcome data from GenOMICC. Top SNPs are rs1131964 (chr21:34610487) and rs11085727 (chr19:10466123), respectively. Color bars show  $r^2$  with top SNP. The orange dashed line represents the SMR effect-size estimates of the top cis-eQTL (i.e. it is not a regression line). (c,d) Generalized summary-data-based Mendelian randomisation (GSMDR) for *IFNAR2* and *TYK2* using exposure data from eQTLgen and outcome data from GenOMICC. SNPs are quasi-independent, following LD and HEIDI-outlier filtering. Error bars show standard errors centred on the mean.

# Transcriptome-wide association study

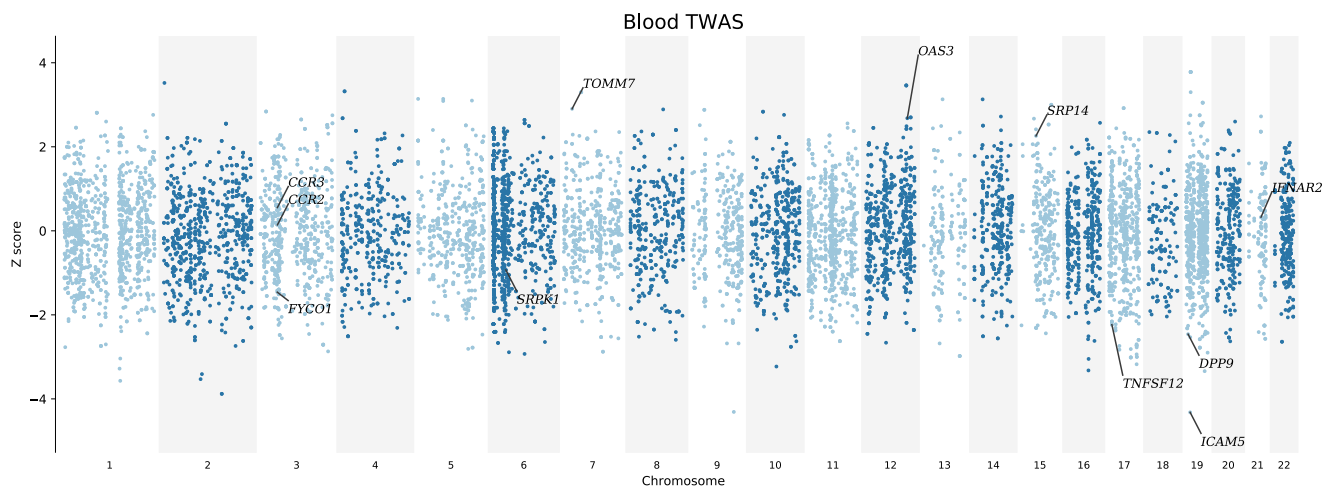

Supplementary Figure 16: Z-scores showing direction of effect for genotype-inferred expression of transcripts encoding protein-coding genes in blood (GTExV8).

Supplementary Table 7: Meta-analysis of the TWAS from whole blood and lung using MultiXcan. Gene names are provided, with p value for the meta-analysis. n tissues is the number of tissues in which the original TWAS was performed; best tissue indicates the tissue with lower p value in the original TWAS (Lung or Whole Blood); p best tissue is the p value of the TWAS in the best tissue.

| gene name | p.val meta | n tissues | p.val best tissue | best tissue | FDR p.val | Bonferroni p.val |
|-----------|------------|-----------|-------------------|-------------|-----------|------------------|
| CXCR6     | 2.4e-15    | 1         | 2.4e-15           | Lung        | 2.8e-11   | 2.8e-11          |
| OAS3      | 4e-09      | 2         | 0.0074            | Whole_Blood | 2.3e-05   | 4.6e-05          |
| CCR3      | 2.7e-07    | 2         | 5e-08             | Lung        | 0.0011    | 0.0032           |
| MAT2B     | 9.6e-07    | 1         | 9.6e-07           | Lung        | 0.0028    | 0.011            |
| CCR2      | 1.6e-06    | 2         | 6.4e-07           | Lung        | 0.0036    | 0.018            |
| TNFSF15   | 1.3e-05    | 2         | 1.6e-05           | Whole_Blood | 0.025     | 0.15             |
| ICAM5     | 1.6e-05    | 2         | 1.6e-05           | Whole_Blood | 0.026     | 0.18             |
| FYCO1     | 2e-05      | 2         | 1.6e-05           | Lung        | 0.029     | 0.24             |

Supplementary Table 8: Genes with false discovery rate (FDR)<0.05 from TWAS analysis of imputed summary statistics for European individuals GWAS and Lung gene expression in GTExV8.

| gene name | z.score | p.val twas | FDR p.val | Bonferroni p.val |
|-----------|---------|------------|-----------|------------------|
| CXCR6     | -7.9    | 2.4e-15    | 2.3e-11   | 2.3e-11          |
| CCR3      | -5.4    | 5e-08      | 0.00024   | 0.00048          |
| CCR2      | 5       | 6.4e-07    | 0.002     | 0.006            |

| gene name | z.score | p.val twas | FDR p.val | Bonferroni p.val |
|-----------|---------|------------|-----------|------------------|
| MAT2B     | -4.9    | 9.6e-07    | 0.0023    | 0.0091           |
| FYCO1     | 4.3     | 1.6e-05    | 0.024     | 0.15             |
| ICAM5     | -4.3    | 1.6e-05    | 0.024     | 0.15             |
| TNFSF15   | -4.3    | 1.8e-05    | 0.024     | 0.17             |

Supplementary Table 9: Genes with false discovery rate (FDR) $<0.05$  from TWAS analysis of imputed summary statistics for European individuals GWAS and Whole Blood gene expression in GTExV8.

| gene name  | z.score | p.val twas | FDR p.val | Bonferroni p.val |
|------------|---------|------------|-----------|------------------|
| AC009961.3 | -4.3    | 1.5e-05    | 0.044     | 0.12             |
| ICAM5      | -4.3    | 1.6e-05    | 0.044     | 0.13             |
| TNFSF15    | -4.3    | 1.6e-05    | 0.044     | 0.13             |

# Gene-level burden of significance

Supplementary Table 10: Protein-coding genes with  $< 5 \times 10^{-6}$  in gene-level burden of significance testing with MAGMA in GenOMICC GWAS (European ancestry). These 12 genes had a gene level p-value  $< 5 \times 10^{-6}$ . Of these 12 genes, 7 are found in the 3p21.31 locus: *LZTFL1*, *FYCO1*, *XCR1*, *CXCR6*, *CCR1*, *CCR3* & *CCR2*. The genes *OAS1*, *OAS2*, *OAS3* are grouped in locus q24.13 on chromosome 12. Gene set analysis of gene-level burden of significance did not identify any significantly enriched pathways or gene ontology terms after correction multiple comparisons (FDR $<0.05$ ).<sup>9</sup>

| Gene           | P          | Number of variants |
|----------------|------------|--------------------|
| <i>LZTFL1</i>  | 7.9751E-14 | 103                |
| <i>FYCO1</i>   | 1.7685E-13 | 191                |
| <i>XCR1</i>    | 3.5541E-13 | 46                 |
| <i>CXCR6</i>   | 1.5365E-09 | 34                 |
| <i>OAS3</i>    | 8.6688E-09 | 111                |
| <i>CCR1</i>    | 2.1795E-07 | 32                 |
| <i>OAS2</i>    | 4.3267E-07 | 55                 |
| <i>IFNAR2</i>  | 6.253E-07  | 90                 |
| <i>CCR3</i>    | 7.046E-07  | 52                 |
| <i>CCR2</i>    | 1.2877E-06 | 27                 |
| <i>OAS1</i>    | 2.1406E-06 | 36                 |
| <i>TNFSF15</i> | 5.3835E-06 | 22                 |

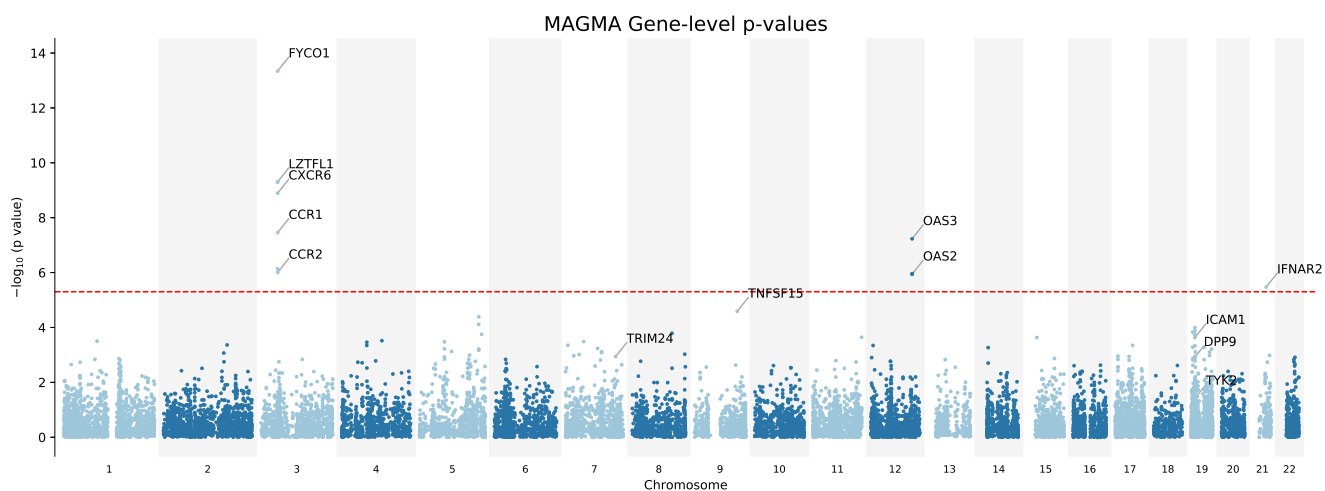

Supplementary Figure 17: Manhattan plot of gene-level burden of significance tests (MAGMA)

# Heritability and high-definition likelihood (HDL)

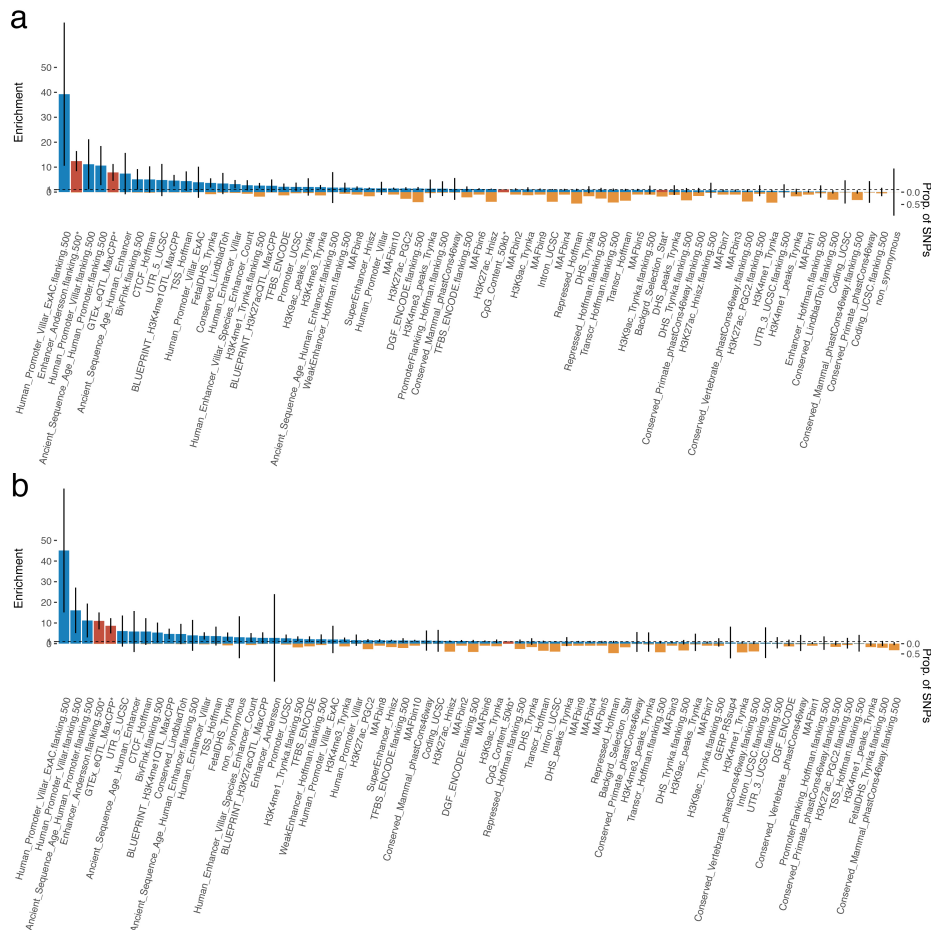

Supplementary Figure 18: Heritability enrichment analysis of COVID-19 across functional genomic annotations. a) EUR ancestry; b) Meta-analysis. Enrichment of COVID-19 heritability was performed using stratified LD score regression by estimating the heritability among the SNPs annotated within the functional regions. The error bars represent standard errors centred around mean enrichment estimates. Enrichment estimates with Bonferroni-corrected  $P < 0.05$  are highlighted in red.

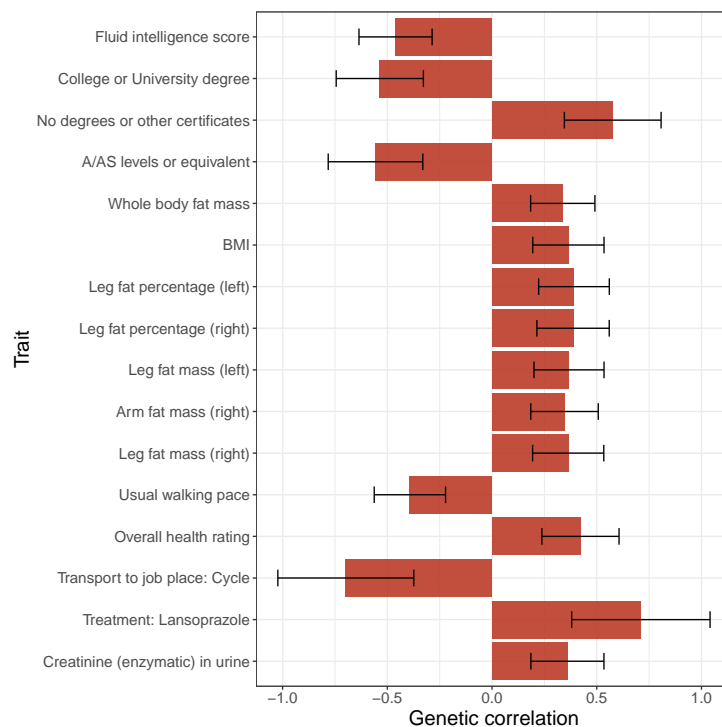

(a)

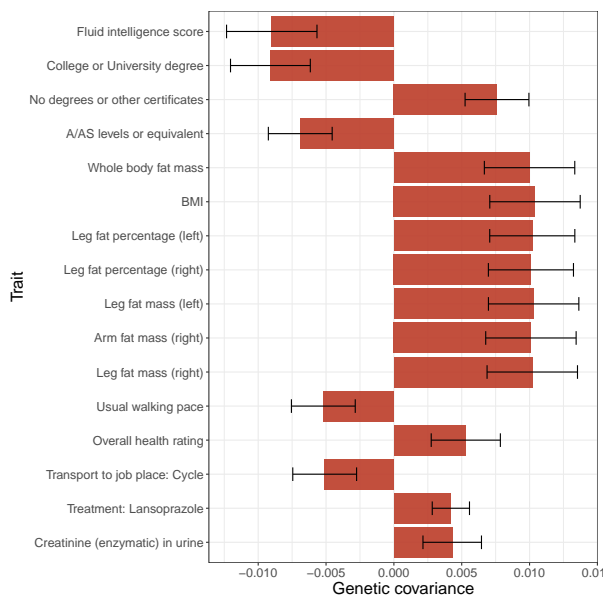

(b)

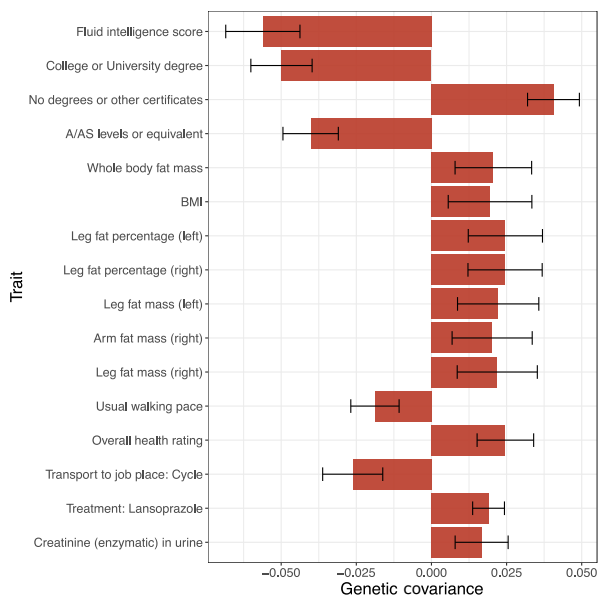

(c)

Supplementary Figure 19: Genetic correlation and covariance analyses. (a) Significant genetic correlations between GenOMICC primary analysis (EUR vs UK Biobank) of severe COVID-19 and complex traits. Genetic correlations were tested via genetic covariances using high-definition likelihood (HDL) between COVID-19 EUR ancestry GWAS and 818 complex traits GWAS summary statistics. Displayed are significant discoveries at 5% level after Bonferroni correction for 818 tests. Whiskers represent 95% confidence intervals. (b,c) Validation of discovered genetic correlations between severe COVID-19 and complex traits based on GWAS with different control groups: (b) using controls from 100,000 genomes project and (c) closely-matched controls from UK Biobank (see Supplementary Figure 14). HDL was used to estimate the genetic covariances. Genetic correlations are not reported due to estimated COVID-19 heritabilities being close to zero.

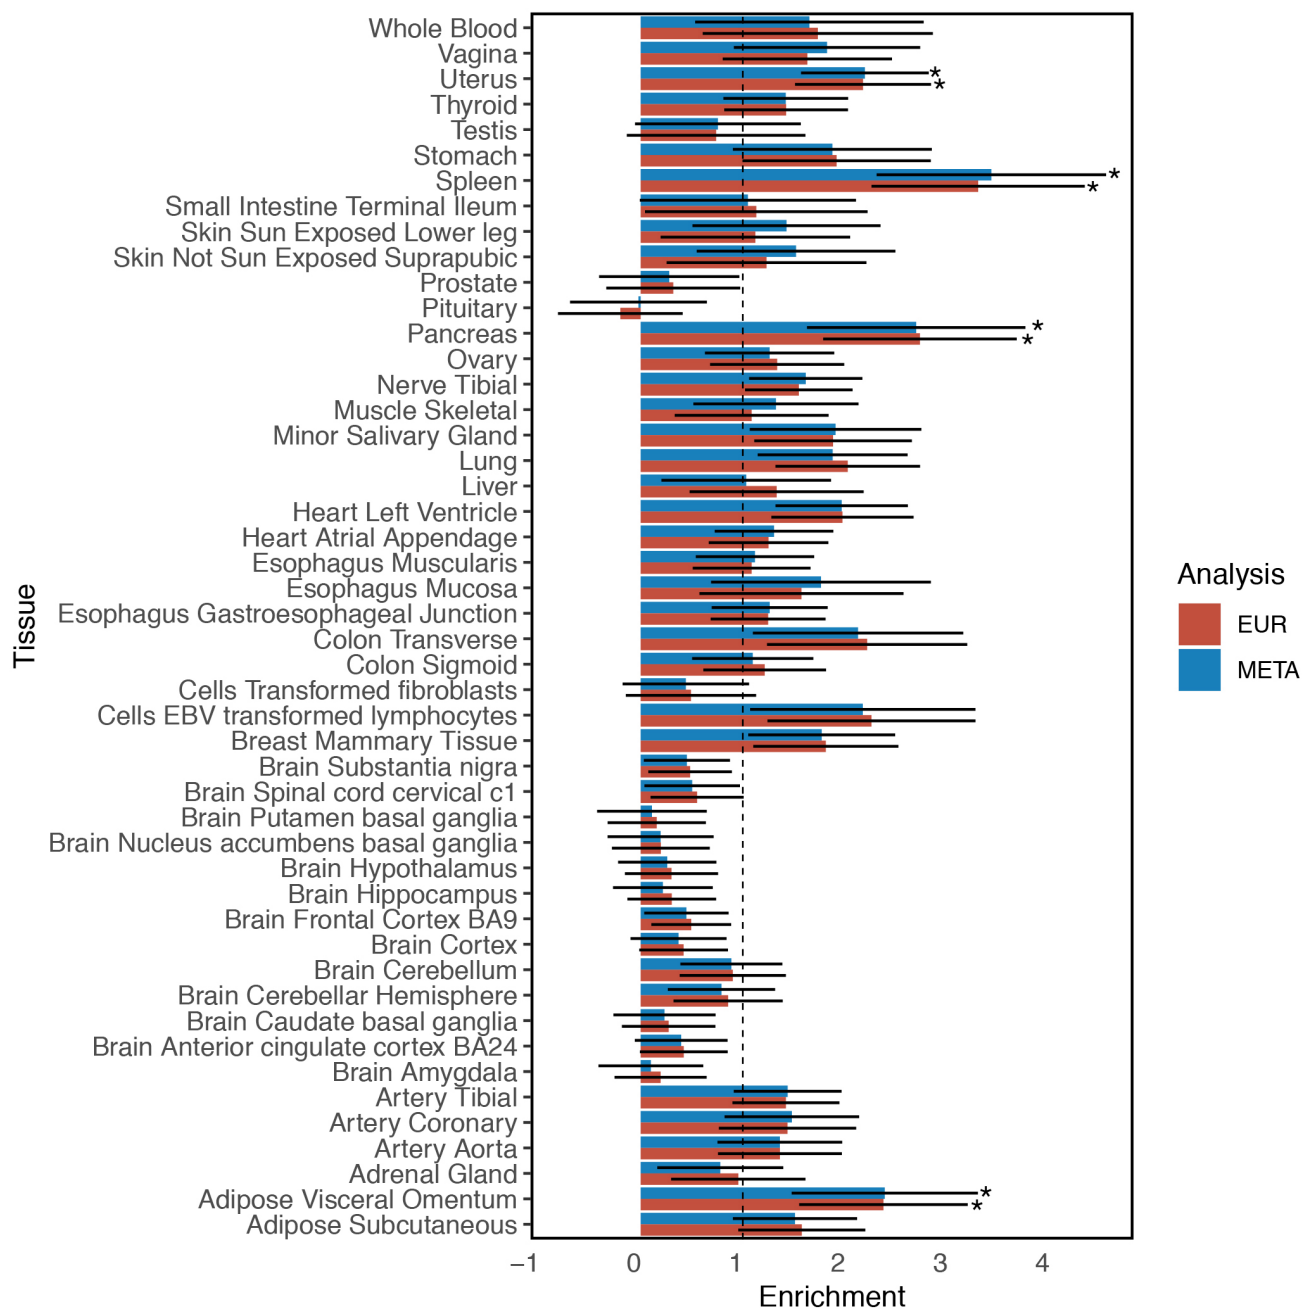

Supplementary Figure 20: Heritability enrichment analysis of COVID-19 across human tissues. Enrichment of COVID-19 heritability in 48 tissues was performed using stratified LD score regression by estimating the heritability among the top 10% specifically expressed genes in each tissue. The enrichment statistics represent whether the observed heritability on tissue-specific genes was higher than expected (Enrichment = 1). The error bars represent standard errors centred around mean enrichment estimates. Results are shown for GenOMICC EUR vs UK Biobank (primary analysis) (EUR) and GenOMICC trans-ethnic meta-analysis (META).



# Contributors

## GenOMICC consortium

*(Recruiting sites are listed in descending order of the number of patients recruited per site)*

**GenOMICC co-investigators** Sara Clohisey<sup>1</sup>, Peter Horby<sup>21</sup>, Johnny Millar<sup>1</sup>, Julian Knight<sup>14</sup>, Hugh Montgomery<sup>29</sup>, David Maslove<sup>25</sup>, Lowell Ling<sup>26</sup>, Alistair Nichol<sup>22</sup>, Charlotte Summers<sup>15</sup>, Tim Walsh<sup>11</sup>, Charles Hinds<sup>20</sup>, Malcolm G. Semple<sup>18,38</sup>, Peter J.M. Openshaw<sup>36,37</sup>, Manu Shankar-Hari<sup>16</sup>, Antonia Ho<sup>19</sup>, Danny McAuley<sup>27,28</sup>, Chris Ponting<sup>2</sup>, Kathy Rowan<sup>7</sup>, J. Kenneth Baillie<sup>1,2,11</sup>.

**Central management and laboratory team** Fiona Griffiths<sup>1</sup>, Wilna Oosthuyzen<sup>1</sup>, Jen Meikle<sup>1</sup>, Paul Finernan<sup>1</sup>, James Furniss<sup>1</sup>, Ellie McMaster<sup>1</sup>, Andy Law<sup>1</sup>, Sara Clohisey<sup>1</sup>, J. Kenneth Baillie<sup>1,11</sup>, Trevor Paterson<sup>1</sup>, Tony Wackett<sup>1</sup>, Ruth Armstrong<sup>1</sup>, Lee Murphy<sup>6</sup>, Angie Fawkes<sup>6</sup>, Richard Clark<sup>6</sup>, Audrey Coutts<sup>6</sup>, Lorna Donnelly<sup>6</sup>, Tammy Gilchrist<sup>6</sup>, Katarzyna Hafezi<sup>6</sup>, Louise Macgillivray<sup>6</sup>, Alan Maclean<sup>6</sup>, Sarah McCafferty<sup>6</sup>, Kirstie Morrice<sup>6</sup>, Jane Weaver<sup>1</sup>, Ceilia Boz<sup>1</sup>, Ailsa Golightly<sup>1</sup>, Mari Ward<sup>1</sup>, Hanning Mal<sup>1</sup>, Helen Szoor-McElhinney<sup>1</sup>, Adam Brown<sup>1</sup>, Ross Hendry<sup>1</sup>, Andrew Stenhouse<sup>1</sup>, Louise Cullum<sup>1</sup>, Dawn Law<sup>1</sup>, Sarah Law<sup>1</sup>, Rachel Law<sup>1</sup>, Max Head Fourman<sup>1</sup>, Maaïke Swets<sup>1</sup>, Nicky Day<sup>1</sup>, Filip Taneski<sup>1</sup>, Esther Duncan<sup>1</sup>, Marie Zechner<sup>1</sup>, Nicholas Parkinson<sup>1</sup>.

**Data analysis team** Erola Pairo-Castineira<sup>1,2</sup>, Sara Clohisey<sup>1</sup>, Lucija Klaric<sup>2</sup>, Andrew D. Bretherick<sup>2</sup>, Konrad Rawlik<sup>1</sup>, Dorota Pasko<sup>3</sup>, Susan Walker<sup>3</sup>, Nick Parkinson<sup>1</sup>, Max Head Fourman<sup>1</sup>, Clark D Russell<sup>1,4</sup>, James Furniss<sup>1</sup>, Anne Richmond<sup>2</sup>, Elvina Gountouna<sup>5</sup>, David Harrison<sup>7</sup>, Bo Wang<sup>1</sup>, Yang Wu<sup>8</sup>, Alison Meynert<sup>2</sup>, Athanasios Kousathanas<sup>3</sup>, Loukas Moutsianas<sup>3</sup>, Zhijian Yang<sup>9</sup>, Ranran Zhai<sup>9</sup>, Chenqing Zheng<sup>9</sup>, Graeme Grimes<sup>2</sup>, Jonathan Millar<sup>1</sup>, Barbara Shih<sup>1</sup>, Marie Zechner<sup>1</sup>, Jian Yang<sup>12,13</sup>, Xia Shen<sup>9,33,34</sup>, Chris P. Ponting<sup>2</sup>, Albert Tenesa<sup>1,2,33</sup>, Kathy Rowan<sup>7</sup>, Andrew Law<sup>1</sup>, Veronique Vitart<sup>2</sup>, James F. Wilson<sup>2,33</sup>, J. Kenneth Baillie<sup>1,2,11</sup>.

**Barts Health NHS Trust, London, UK** D Collier<sup>39</sup>, S Wood<sup>39</sup>, A Zak<sup>39</sup>, C Borra<sup>39</sup>, M Matharu<sup>39</sup>, P May<sup>39</sup>, Z Alldis<sup>39</sup>, O Mitchelmore<sup>39</sup>, R Bowles<sup>39</sup>, A Easthorpe<sup>39</sup>, F Bibi<sup>39</sup>, I Lancoma-Malcolm<sup>39</sup>, J Gurasashvili<sup>39</sup>, J Pheby<sup>39</sup>, J Shiel<sup>39</sup>, M Bolton<sup>39</sup>, M Patel<sup>39</sup>, M Taylor<sup>39</sup>, O Zongo<sup>39</sup>, P Ebano<sup>39</sup>, P Harding<sup>39</sup>, R Astin-Chamberlain<sup>39</sup>, Y Choudhury<sup>39</sup>, A Cox<sup>39</sup>, D Kallon<sup>39</sup>, M Burton<sup>39</sup>, R Hall<sup>39</sup>, S Blowes<sup>39</sup>, Z Prime<sup>39</sup>, J Biddle<sup>39</sup>, O Prysyazhna<sup>39</sup>, T Newman<sup>39</sup>, C Tierney<sup>39</sup>, J Kassam<sup>39</sup>.

**Guys and St Thomas' Hospital, London, UK** M Shankar-Hari<sup>40</sup>, M Ostermann<sup>40</sup>, S Campos<sup>40</sup>, A Bociek<sup>40</sup>, R Lim<sup>40</sup>, N Grau<sup>40</sup>, T O Jones<sup>40</sup>, C Whitton<sup>40</sup>, M Marotti<sup>40</sup>, G Arbane<sup>40</sup>.

**James Cook University Hospital, Middlesburgh, UK** S. Bonner<sup>41</sup>, K Hugill<sup>41</sup>, J Reid<sup>41</sup>.

**The Royal Liverpool University Hospital, Liverpool, UK** I Welters<sup>42</sup>, V Waugh<sup>42</sup>, K Williams<sup>42</sup>, D Shaw<sup>42</sup>, J Fernandez Roman<sup>42</sup>, M Lopez Martinez<sup>42</sup>, E Johnson<sup>42</sup>, A Waite<sup>42</sup>, B Johnson<sup>42</sup>, O Hamilton<sup>42</sup>, S Mulla<sup>42</sup>.

**King's College Hospital, London, UK** M McPhail<sup>43</sup>, J Smith<sup>43</sup>.

**Royal Infirmary of Edinburgh, Edinburgh, UK** J K Baillie<sup>1,2,11</sup>, L Barclay<sup>44</sup>, D Hope<sup>44</sup>, C McCulloch<sup>44</sup>, L McQuillan<sup>44</sup>, S Clark<sup>44</sup>, J Singleton<sup>44</sup>, K Priestley<sup>44</sup>, N Rea<sup>44</sup>, M Callaghan<sup>44</sup>, R Campbell<sup>44</sup>, G Andrew<sup>44</sup>, L Marshall<sup>44</sup>.

**John Radcliffe Hospital, Oxford, UK** S McKechnie<sup>45</sup>, P Hutton<sup>45</sup>, A Bashyal<sup>45</sup>, N Davidson<sup>45</sup>.

**Addenbrooke's Hospital, Cambridge, UK** C Summers<sup>46</sup>, P Polgarova<sup>46</sup>, K Stroud<sup>46</sup>, N Pathan<sup>46</sup>, K Elston<sup>46</sup>, S Agrawal<sup>46</sup>.

**Morrison Hospital, Swansea, UK** C Battle<sup>47</sup>, L Newey<sup>47</sup>, T Rees<sup>47</sup>, R Harford<sup>47</sup>, E Brinkworth<sup>47</sup>, M Williams<sup>47</sup>, C Murphy<sup>47</sup>.

**Ashford and St Peter's Hospital, Surrey, UK** I White<sup>48</sup>, M Croft<sup>48</sup>.

**Royal Stoke University Hospital, Staffordshire, UK** N Bandla<sup>49</sup>, M Gellamucho<sup>49</sup>, J Tomlinson<sup>49</sup>, H Turner<sup>49</sup>, M Davies<sup>49</sup>, A Quinn<sup>49</sup>, I Hussain<sup>49</sup>, C Thompson<sup>49</sup>, H Parker<sup>49</sup>, R Bradley<sup>49</sup>, R Griffiths<sup>49</sup>.

**Queen Elizabeth Hospital, Birmingham, UK** J. Scriven<sup>50</sup>, J Gill<sup>50</sup>.

**Glasgow Royal Infirmary, Glasgow, UK** A Puxty<sup>51</sup>, S Cathcart<sup>51</sup>, D Salutous<sup>51</sup>, L Turner<sup>51</sup>, K Duffy<sup>51</sup>, K Puxty<sup>51</sup>.

**Kingston Hospital, Surrey, UK** A Joseph<sup>52</sup>, R Herdman-Grant<sup>52</sup>, R Simms<sup>52</sup>, A Swain<sup>52</sup>, A Naranjo<sup>52</sup>, R Crowe<sup>52</sup>, K Sollesta<sup>52</sup>, A Loveridge<sup>52</sup>, D Baptista<sup>52</sup>, E Morino<sup>52</sup>.

**The Tunbridge Wells Hospital and Maidstone Hospital, Kent, UK** M Davey<sup>53</sup>, D Golden<sup>53</sup>, J Jones<sup>53</sup>.

**North Middlesex University Hospital NHS trust, London, UK** J Moreno Cuesta<sup>54</sup>, A Haldeos<sup>54</sup>, D Bakthavatsalam<sup>54</sup>, R Vincent<sup>54</sup>, M Elhassan<sup>54</sup>, K Xavier<sup>54</sup>, A Ganesan<sup>54</sup>, D Purohit M Abdelrazik<sup>54</sup>.

**Bradford Royal Infirmary, Bradford, UK** J Morgan<sup>55</sup>, L Akeroyd<sup>55</sup>, S Bano<sup>55</sup>, D Warren<sup>55</sup>, M Bromley<sup>55</sup>, K Sellick<sup>55</sup>, L Guri<sup>55</sup>, B Wilkinson<sup>55</sup>, V Nagarajan<sup>55</sup>, P Szedlak<sup>55</sup>.

**Blackpool Victoria Hospital, Blackpool, UK** J Cupitt<sup>56</sup>, E Stoddard<sup>56</sup>, L Benham<sup>56</sup>, S Preston<sup>56</sup>, N Slawson<sup>56</sup>, Z Bradshaw<sup>56</sup>, J brown<sup>56</sup>, M Caswell<sup>56</sup>, S Melling<sup>56</sup>.

**Countess of Chester Hospital, Chester, UK** P Bamford<sup>57</sup>, M Faulkner<sup>57</sup>, K Cawley<sup>57</sup>, H Jeffrey<sup>57</sup>, E London<sup>57</sup>, H Sainsbury<sup>57</sup>, I Nagra<sup>57</sup>, F Nasir<sup>57</sup>, Ce Dunmore<sup>57</sup>, R Jones<sup>57</sup>, A Abraheem<sup>57</sup>, M Al-Moasseb<sup>57</sup>, R Girach<sup>57</sup>.

**Wythenshawe Hospital, Manchester, UK** C Brantwood<sup>58</sup>, P Alexander<sup>58</sup>, J Bradley-Potts<sup>58</sup>, S Allen<sup>58</sup>, T Felton<sup>58</sup>.

**St George's Hospital, London, UK** S Manna<sup>59</sup>, S Farnell-Ward<sup>59</sup>, S Leaver<sup>59</sup>, J Queiroz<sup>59</sup>, E Maccacari<sup>59</sup>, D Dawson<sup>59</sup>, C Castro Delgado<sup>59</sup>, R Pepermans Saluzzio<sup>59</sup>, O Ezeobu<sup>59</sup>, L Ding<sup>59</sup>, C Sicut<sup>59</sup>, R Kanu<sup>59</sup>, G Durrant<sup>59</sup>, J Texeira<sup>59</sup>, A Harrison<sup>59</sup>, T Samakomva<sup>59</sup>.

**Good Hope Hospital, Birmingham, UK** J Scriven<sup>60</sup>, H Willis<sup>60</sup>, B Hopkins<sup>60</sup>, L Thrasyvoulou<sup>60</sup>.

**Stepping Hill Hospital, Stockport, UK** M Jackson<sup>61</sup>, A Zaki<sup>61</sup>, C Tibke<sup>61</sup>, S Bennett<sup>61</sup>, W Woodyatt<sup>61</sup>, A Kent<sup>61</sup>, E Goodwin<sup>61</sup>.

**Manchester Royal Infirmary, Manchester, UK** C Brandwood<sup>62</sup>, R Clark<sup>62</sup>, L Smith<sup>62</sup>.

**Royal Alexandra Hospital, Paisley, UK** K Rooney<sup>63</sup>, N Thomson<sup>63</sup>, N Rodden<sup>63</sup>, E Hughes<sup>63</sup>, D McGlynn<sup>63</sup>, C Clark<sup>63</sup>, P Clark<sup>63</sup>, L Abel<sup>63</sup>, R Sundaram<sup>63</sup>, L Gemmell<sup>63</sup>, M Brett<sup>63</sup>, J Hornsby<sup>63</sup>, P MacGoey<sup>63</sup>, R Price<sup>63</sup>, B Digby<sup>63</sup>, P O'Neil<sup>63</sup>, P McConnell<sup>63</sup>, P Henderson<sup>63</sup>.

**Queen Elizabeth University Hospital, Glasgow, UK** S Henderson<sup>64</sup>, M Sim<sup>64</sup>, S Kennedy-Hay<sup>64</sup>, C McParland<sup>64</sup>, L Rooney<sup>64</sup>, N Baxter<sup>64</sup>.

**Queen Alexandra Hospital, Portsmouth, UK** D Pogson<sup>65</sup>, S Rose<sup>65</sup>, Z Daly<sup>65</sup>, L Brimfield<sup>65</sup>.

**BHRUT (Barking Havering) - Queens Hospital and King George Hospital, Essex, UK** M K Phull<sup>66</sup>, M Hussain<sup>66</sup>, T Pogreban<sup>66</sup>, L Rosaroso<sup>66</sup>, E Salciute L Grauslyte<sup>66</sup>.

**University College Hospital, London, UK** D Brealey<sup>67</sup>, E Wraith<sup>67</sup>, N MacCallum<sup>67</sup>, G Bercades<sup>67</sup>, I Hass<sup>67</sup>, D Smyth<sup>67</sup>, A Reyes<sup>67</sup>, G Martir<sup>67</sup>.

**Royal Victoria Infirmary, Newcastle Upon Tyne, UK** I D Clement<sup>68</sup>, K Webster<sup>68</sup>, C Hays<sup>68</sup>, A Gulati<sup>68</sup>.

**Western Sussex Hospitals, West Sussex, UK** L Hodgson<sup>69</sup>, M Margaron<sup>69</sup>, R Gomez<sup>69</sup>, Y Baird<sup>69</sup>, Y Thirlwall<sup>69</sup>, L Folkes<sup>69</sup>, A Butler<sup>69</sup>, E Meadows<sup>69</sup>, S Moore<sup>69</sup>, D Raynard<sup>69</sup>, H Fox<sup>69</sup>, L Riddles<sup>69</sup>, K King<sup>69</sup>, S Kimber<sup>69</sup>, G Hobden<sup>69</sup>, A McCarthy<sup>69</sup>, V Cannons<sup>69</sup>, I Balagosa<sup>69</sup>, I Chadbourn<sup>69</sup>, A Gardner<sup>69</sup>.

**Salford Royal Hospital, Manchester, UK** D Horner<sup>70</sup>, D McLaughlan<sup>70</sup>, B Charles<sup>70</sup>, N Proudfoot<sup>70</sup>, T Marsden<sup>70</sup>, L Mc Morrow<sup>70</sup>, B Blackledge<sup>70</sup>, J Pendlebury<sup>70</sup>, A Harvey<sup>70</sup>, E Apetri<sup>70</sup>, C Basikolo<sup>70</sup>, L Catlow<sup>70</sup>, R Doonan<sup>70</sup>, K Knowles<sup>70</sup>, S Lee<sup>70</sup>, D Lomas<sup>70</sup>, C Lyons<sup>70</sup>, J Perez<sup>70</sup>, M Poulaka<sup>70</sup>, M Slaughter<sup>70</sup>, K Slevin<sup>70</sup>, M Taylor<sup>70</sup>, V Thomas<sup>70</sup>, D Walker<sup>70</sup>, J Harris<sup>70</sup>.

**The Royal Oldham Hospital, Manchester, UK** A Drummond<sup>71</sup>, R Tully<sup>71</sup>, J Dearden<sup>71</sup>, J Philbin<sup>71</sup>, S Munt<sup>71</sup>, C Rishton<sup>71</sup>, G O'Connor<sup>71</sup>, M Mulcahy<sup>71</sup>, E Dobson<sup>71</sup>, J Cuttler<sup>71</sup>, M Edward<sup>71</sup>.

**Pinderfields General Hospital, Wakefield, UK** A Rose<sup>72</sup>, B Sloan<sup>72</sup>, S Buckley<sup>72</sup>, H Brooke<sup>72</sup>, E Smithson<sup>72</sup>, R Charlesworth<sup>72</sup>, R Sandu<sup>72</sup>, M Thirumaran<sup>72</sup>, V Wagstaff<sup>72</sup>, J Cebrian Suarez<sup>72</sup>.

**Basildon Hospital, Basildon, UK** A Kaliappan<sup>73</sup>, M Vertue<sup>73</sup>, A Nicholson<sup>73</sup>, J Riches<sup>73</sup>, A Solesbury<sup>73</sup>, L Kittridge<sup>73</sup>, M Forsey<sup>73</sup>, G Maloney<sup>73</sup>.

**University Hospital of Wales, Cardiff, UK** J Cole<sup>74</sup>, M Davies<sup>74</sup>, R Davies<sup>74</sup>, H Hill<sup>74</sup>, E Thomas<sup>74</sup>, A Williams<sup>74</sup>, D Duffin<sup>74</sup>, B Player<sup>74</sup>.

**Broomfield Hospital, Chelmsford, UK** J Radhakrishnan<sup>75</sup>, S Gibson<sup>75</sup>, A Lyle<sup>75</sup>, F McNeela<sup>75</sup>.

**Royal Brompton Hospital, London, UK** B Patel<sup>76</sup>, M Gummadi<sup>76</sup>, G Sloane<sup>76</sup>, N Dormand<sup>76</sup>, S Salmi<sup>76</sup>, Z Farzad<sup>76</sup>, D Cristiano<sup>76</sup>, K Liyanage<sup>76</sup>, V Thwaites<sup>76</sup>, M Varghese<sup>76</sup>.

**Nottingham University Hospital, Nottingham, UK** M Meredith<sup>77</sup>.

**Royal Hallamshire Hospital and Northern General Hospital, Sheffield, UK** G Mills<sup>78</sup>, J Willson<sup>78</sup>, K Harrington<sup>78</sup>, B Lenagh<sup>78</sup>, K Cawthron<sup>78</sup>, S Masuko<sup>78</sup>, A Raithatha<sup>78</sup>, K Bauchmuller<sup>78</sup>, N Ahmad<sup>78</sup>, J Barker<sup>78</sup>, Y Jackson<sup>78</sup>, F Kibutu<sup>78</sup>, S Bird<sup>78</sup>.

**Royal Hampshire County Hospital, Hampshire, UK** G Watson<sup>79</sup>, J Martin<sup>79</sup>, E Bevan<sup>79</sup>, C Wrey Brown<sup>79</sup>, D Trodd<sup>79</sup>.

**Queens Hospital Burton, Burton-On-Trent, UK** K English<sup>80</sup>, G Bell<sup>80</sup>, L Wilcox<sup>80</sup>, A Katary<sup>80</sup>.

**New Cross Hospital, Wolverhampton, UK** S Gopal<sup>81</sup>, V Lake<sup>81</sup>, N Harris<sup>81</sup>, S Metherell<sup>81</sup>, E Radford<sup>81</sup>.

**Heartlands Hospital, Birmingham, UK** J Scriven<sup>82</sup>, F Moore<sup>82</sup>, H Bancroft<sup>82</sup>, J Daghli<sup>82</sup>, M Sangombe<sup>82</sup>, M Carmody<sup>82</sup>, J Rhodes<sup>82</sup>, M Bellamy<sup>82</sup>.

**Walsall Manor Hospital, Walsall, UK** A Garg<sup>83</sup>, A Kuravi<sup>83</sup>, E Virgilio<sup>83</sup>, P Ranga<sup>83</sup>, J Butler<sup>83</sup>, L Botfield<sup>83</sup>, C Dexter<sup>83</sup>, J Fletcher<sup>83</sup>.

**Stoke Mandeville Hospital, Buckinghamshire, UK** P Shanmugasundaram<sup>84</sup>, G Hambrook<sup>84</sup>, I Burn<sup>84</sup>, K Manso<sup>84</sup>, D Thornton<sup>84</sup>, J Tebbutt<sup>84</sup>, R Penn<sup>84</sup>.

**Sandwell General Hospital, Birmingham, UK** J Hulme<sup>85</sup>, S Hussain<sup>85</sup>, Z Maqsood<sup>85</sup>, S Joseph<sup>85</sup>, J Colley<sup>85</sup>, A Hayes<sup>85</sup>, C Ahmed<sup>85</sup>, R Haque<sup>85</sup>, S Clamp<sup>85</sup>, R Kumar<sup>85</sup>, M Purewal<sup>85</sup>, B Baines<sup>85</sup>.

**Royal Berkshire NHS Foundation Trust, Berkshire, UK** M Frise<sup>86</sup>, N Jacques<sup>86</sup>, H Coles<sup>86</sup>, J Catterson<sup>86</sup>, S Gurung Rai<sup>86</sup>, M Brunton<sup>86</sup>, E Tilney<sup>86</sup>, L Keating<sup>86</sup>, A Walden<sup>86</sup>.

**Charing Cross Hospital, St Mary's Hospital and Hammersmith Hospital, London, UK** D Antcliffe<sup>87</sup>, A Gordon<sup>87</sup>, M Templeton<sup>87</sup>, R Rojo<sup>87</sup>, D Banach<sup>87</sup>, S Sousa Arias<sup>87</sup>, Z Fernandez<sup>87</sup>, P Coghlan<sup>87</sup>.

**Dumfries and Galloway Royal Infirmary, Dumfries, UK** D Williams<sup>88</sup>, C Jardine<sup>88</sup>.

**Bristol Royal Infirmary, Bristol, UK** J Bewley<sup>89</sup>, K Sweet<sup>89</sup>, L Grimmer<sup>89</sup>, R Johnson<sup>89</sup>, Z Garland<sup>89</sup>, B Gumbrill<sup>89</sup>.

**Royal Sussex County Hospital, Brighton, UK** C Phillips<sup>90</sup>, L Ortiz-Ruiz de Gordoia<sup>90</sup>, E Peasgood<sup>90</sup>.

**Whiston Hospital, Prescot, UK** A Tridente<sup>91</sup>, K Shuker S Greer<sup>91</sup>.

**Royal Glamorgan Hospital, Cardiff, UK** C Lynch<sup>92</sup>, C Potheary<sup>92</sup>, L Roche<sup>92</sup>, B Deacon<sup>92</sup>, K Turner<sup>92</sup>, J Singh<sup>92</sup>, G Sera Howe<sup>92</sup>.

**King's Mill Hospital, Nottingham, UK** P Paul<sup>93</sup>, M Gill<sup>93</sup>, I Wynter<sup>93</sup>, V Ratnam<sup>93</sup>, S Shelton<sup>93</sup>.

**Fairfield General Hospital, Bury, UK** J Naisbitt<sup>94</sup>, J Melville<sup>94</sup>.

**Western General Hospital, Edinburgh, UK** R Baruah<sup>95</sup>, S Morrison<sup>95</sup>.

**Northwick Park Hospital, London, UK** A McGregor<sup>96</sup>, V Parris<sup>96</sup>, M Mpelembue<sup>96</sup>, S Srikanan<sup>96</sup>, C Dennis<sup>96</sup>, A Sukha<sup>96</sup>.

**Royal Preston Hospital, Preston, UK** A Williams<sup>97</sup>, M Verlande<sup>97</sup>.

**Royal Derby Hospital, Derby, UK** K Holding<sup>98</sup>, K Riches<sup>98</sup>, C Downes<sup>98</sup>, C Swan<sup>98</sup>.

**Sunderland Royal Hospital, Sunderland, UK** A Rostron<sup>99</sup>, A Roy<sup>99</sup>, L Woods<sup>99</sup>, S Cornell<sup>99</sup>, F Wakinshaw<sup>99</sup>.

**Royal Surrey County Hospital, Guildford, UK** B Creagh-Brown<sup>100</sup>, H Blackman<sup>100</sup>, A Salberg<sup>100</sup>, E Smith<sup>100</sup>, S Donlon<sup>100</sup>, S Mtuwa<sup>100</sup>, N Michalak-Glinska<sup>100</sup>, S Stone<sup>100</sup>, C Beazley<sup>100</sup>, V Pristopan<sup>100</sup>.

**Derriford Hospital, Plymouth, UK** N Nikitas<sup>101</sup>, L Lankester<sup>101</sup>, C Wells<sup>101</sup>.

**Croydon University Hospital, Croydon, UK** A S Raj<sup>102</sup>, K Fletcher<sup>102</sup>, R Khade<sup>102</sup>, G Tsinaslanidis<sup>102</sup>.

**Victoria Hospital, Kirkcaldy, UK** M McMahon<sup>103</sup>, S Fowler<sup>103</sup>, A McGregor<sup>103</sup>, T Coventry<sup>103</sup>.

**Milton Keynes University Hospital, Milton Keynes, UK** R Stewart<sup>104</sup>, L Wren<sup>104</sup>, E Mwaura<sup>104</sup>, L Mew<sup>104</sup>, A Rose<sup>104</sup>, D Scaletta<sup>104</sup>, F Williams<sup>104</sup>.

**Barnsley Hospital, Barnsley, UK** K Inweregbu<sup>105</sup>, A Nicholson<sup>105</sup>, N Lancaster<sup>105</sup>, M Cunningham<sup>105</sup>, A Daniels<sup>105</sup>, L Harrison<sup>105</sup>, S Hope<sup>105</sup>, S Jones<sup>105</sup>, A Crew<sup>105</sup>, G Wray<sup>105</sup>, J Matthews<sup>105</sup>, R Crawley<sup>105</sup>.

**York Hospital, York, UK** J Carter<sup>106</sup>, I Birkinshaw<sup>106</sup>, J Ingham<sup>106</sup>, Z Scott<sup>106</sup>, K Howard<sup>106</sup>, R Joy<sup>106</sup>, S Roche<sup>106</sup>.

**University Hospital of North Tees, Stockton on Tees, UK** M Clark<sup>107</sup>, S Purvis<sup>107</sup>.

**University Hospital Wishaw, Wishaw, UK** A Morrison<sup>108</sup>, D Strachan<sup>108</sup>, M Taylor<sup>108</sup>, S Clements<sup>108</sup>, K Black<sup>108</sup>.

**Whittington Hospital, London, UK** C Parmar<sup>109</sup>, A Altabaibeh<sup>109</sup>, K Simpson<sup>109</sup>, L Mostoles<sup>109</sup>, K Gilbert<sup>109</sup>, L Ma<sup>109</sup>, A Alvaro<sup>109</sup>.

**Southmead Hospital, Bristol, UK** M Thomas<sup>110</sup>, B Faulkner<sup>110</sup>, R Worner<sup>110</sup>, K Hayes<sup>110</sup>, E Gendall<sup>110</sup>, H Blakemore<sup>110</sup>, B Borislavova<sup>110</sup>, E Goff<sup>110</sup>.

**The Royal Papworth Hospital, Cambridge, UK** A Vuylsteke<sup>111</sup>, L Mwaura<sup>111</sup>, J Zamikula<sup>111</sup>, L Garner<sup>111</sup>, A Mitchell<sup>111</sup>, S Mephram<sup>111</sup>, L Cagova<sup>111</sup>, A Fofano<sup>111</sup>, H Holcombe<sup>111</sup>, K Praman<sup>111</sup>.

**Royal Gwent Hospital, Newport, UK** T Szakmany<sup>112</sup>, A E Heron<sup>112</sup>, S Cherian<sup>112</sup>, S Cutler<sup>112</sup>, A Roynon-Reed<sup>112</sup>.

**Norfolk and Norwich University hospital (NNUH), Norwich, UK** G Randell<sup>113</sup>, K Convery<sup>113</sup>, K Stammers D Fottrell-Gould<sup>113</sup>, L Hudig<sup>113</sup>, J Keshet-price<sup>113</sup>.

**Great Ormond St Hospital and UCL Great Ormond St Institute of Child Health NIHR Biomedical Research Centre, London, UK** M Peters<sup>114</sup>, L O'Neill<sup>114</sup>, S Ray<sup>114</sup>, H Belfield<sup>114</sup>, T McHugh<sup>114</sup>, G Jones<sup>114</sup>, O Akinkugbe<sup>114</sup>, A Tomas<sup>114</sup>, E Abaleke<sup>114</sup>, E Beech<sup>114</sup>, H Meghari<sup>114</sup>, S Yussuf<sup>114</sup>, A Bamford<sup>114</sup>.

**Airedale General Hospital, Keighley, UK** B Hairsine<sup>115</sup>, E Dooks<sup>115</sup>, F Farquhar<sup>115</sup>, S Packham<sup>115</sup>, H Bates<sup>115</sup>, C McParland<sup>115</sup>, L Armstrong<sup>115</sup>.

**Aberdeen Royal Infirmary, Aberdeen, UK** C Kaye<sup>116</sup>, A Allan<sup>116</sup>, J Medhora<sup>116</sup>, J Liew<sup>116</sup>, A Botello<sup>116</sup>, F Anderson<sup>116</sup>.

**Southampton General Hospital, Southampton, UK** R Cusack<sup>117</sup>, H Golding<sup>117</sup>, K Prager<sup>117</sup>, T Williams<sup>117</sup>, S Leggett<sup>117</sup>, K Golder<sup>117</sup>, M Male<sup>117</sup>, O Jones<sup>117</sup>, K Criste<sup>117</sup>, M Marani<sup>117</sup>.

**Russell's Hall Hospital, Dudley, UK** Dr. Anumakonda<sup>118</sup>, V Amin<sup>118</sup>, K Karthik<sup>118</sup>, R Kausar<sup>118</sup>, E Anastasescu<sup>118</sup>, K Reid<sup>118</sup>, Ms. Jacqui<sup>118</sup>.

**Rotherham General Hospital, Rotherham, UK** A Hormis<sup>119</sup>, R Walker<sup>119</sup>, D Collier<sup>119</sup>.

**North Manchester General Hospital, Manchester, UK** T Duncan<sup>120</sup>, A Uriel<sup>120</sup>, A Ustianowski<sup>120</sup>, H T-Michael<sup>120</sup>, M Bruce<sup>120</sup>, K Connolly<sup>120</sup>, K Smith<sup>120</sup>.

**Basingstoke and North Hampshire Hospital, Basingstoke, UK** R Partridge<sup>121</sup>, D Griffin<sup>121</sup>, M McDonald<sup>121</sup>, N Muchenje<sup>121</sup>.

**Royal Free Hospital, London, UK** D Martin<sup>122</sup>, H Filipe<sup>122</sup>, C Eastgate<sup>122</sup>, C Jackson<sup>122</sup>.

**Hull Royal Infirmary, Hull, UK** A Gratrix<sup>123</sup>, L Foster<sup>123</sup>, V Martinson<sup>123</sup>, E Stones<sup>123</sup>, Caroline Abernathy<sup>123</sup>, P Parkinson<sup>123</sup>.

**Harefield Hospital, London, UK** A Reed<sup>124</sup>, C Prendergast<sup>124</sup>, P Rogers<sup>124</sup>, M Woodruff<sup>124</sup>, R Shokkar<sup>124</sup>, S Kaul<sup>124</sup>, A Barron<sup>124</sup>, C Collins<sup>124</sup>.

**Chesterfield Royal Hospital Foundation Trust, Chesterfield, UK** S Beavis<sup>125</sup>, A Whileman<sup>125</sup>, K Dale<sup>125</sup>, J Hawes<sup>125</sup>, K Pritchard<sup>125</sup>, R Gascoyne<sup>125</sup>, L Stevenson<sup>125</sup>.

**Barnet Hospital, London, UK** R Jha<sup>126</sup>, L Lim<sup>126</sup>, V Krishnamurthy<sup>126</sup>.

**Aintree University Hospital, Liverpool, UK** R Parker<sup>127</sup>, I Turner-Bone<sup>127</sup>, L Wilding<sup>127</sup>, A Reddy<sup>127</sup>.

**St James's University Hospital and Leeds General Infirmary, Leeds, UK** S Whiteley<sup>128</sup>, E Wilby<sup>128</sup>, C Howcroft<sup>128</sup>, A Aspinwall<sup>128</sup>, S Charlton<sup>128</sup>, B Ogg<sup>128</sup>.

**Glan Clwyd Hospital, Bodelwyddan, UK** D Menzies<sup>129</sup>, R Pugh<sup>129</sup>, E Allan<sup>129</sup>, R Lean<sup>129</sup>, F Davies<sup>129</sup>, J Easton<sup>129</sup>, X Qiu<sup>129</sup>, S Kumar<sup>129</sup>, K Darlington<sup>129</sup>.

**University Hospital Crosshouse, Kilmarnock, UK** G Houston<sup>130</sup>, P O'Brien<sup>130</sup>, T Geary<sup>130</sup>, J Allan<sup>130</sup>, A Meikle<sup>130</sup>.

**Royal Bolton Hospital, Bolton, UK** G Hughes<sup>131</sup>, M Balasubramaniam<sup>131</sup>, S Latham<sup>131</sup>, E McKenna<sup>131</sup>, R Flanagan<sup>131</sup>.

**Princess of Wales Hospital, Llantrisant, UK** S Sathe<sup>132</sup>, E Davies<sup>132</sup>, L Roche<sup>132</sup>.

**Pilgrim Hospital, Lincoln, UK** M Chablani<sup>133</sup>, A Kirkby<sup>133</sup>, K Netherton<sup>133</sup>, S Archer<sup>133</sup>.

**Northumbria Healthcare NHS Foundation Trust, North Shields, UK** B Yates<sup>134</sup>, C Ashbrook-Raby<sup>134</sup>.

**Ninewells Hospital, Dundee, UK** S Cole<sup>135</sup>, M Casey<sup>135</sup>, L Cabrelli<sup>135</sup>, S Chapman<sup>135</sup>, M Casey<sup>135</sup>, P Austin<sup>135</sup>, A Hutcheon<sup>135</sup>, C Whyte<sup>135</sup>, C Almaden-Boyle<sup>135</sup>.

**Lister Hospital, Stevenage, UK** N Pattison<sup>136</sup>, C Cruz<sup>136</sup>.

**Bedford Hospital, Bedford, UK** A Vochin<sup>137</sup>, H Kent<sup>137</sup>, A Thomas<sup>137</sup>, S Murdoch<sup>137</sup>, B David<sup>137</sup>, M Penacerrada<sup>137</sup>, G Lubimbi<sup>137</sup>, V Bastion<sup>137</sup>, R Wulandari<sup>137</sup>, J Valentine<sup>137</sup>, D Clarke<sup>137</sup>.

**Royal United Hospital, Bath, UK** A Serrano-Ruiz<sup>138</sup>, S Hierons<sup>138</sup>, L Ramos<sup>138</sup>, C Demetriou<sup>138</sup>, S Mitchard<sup>138</sup>, K White<sup>138</sup>.

**Royal Bournemouth Hospital, Bournemouth, UK** N White<sup>139</sup>, S Pitts<sup>139</sup>, D Branney<sup>139</sup>, J Frankham<sup>139</sup>.

**The Great Western Hospital, Swindon, UK** M Watters<sup>140</sup>, H Langton<sup>140</sup>, R Prout<sup>140</sup>.

**Watford General Hospital, Watford, UK** V Page<sup>141</sup>, T Varghes<sup>141</sup>.

**University Hospital North Durham, Darlington, UK** A Cowton<sup>142</sup>, A Kay<sup>142</sup>, K Potts<sup>142</sup>, M Birt<sup>142</sup>, M Kent<sup>142</sup>, A Wilkinson<sup>142</sup>.

**Tameside General Hospital, Ashton Under Lyne, UK** E Jude<sup>143</sup>, V Turner<sup>143</sup>, H Savill<sup>143</sup>, J McCormick<sup>143</sup>, M Clark<sup>143</sup>, M Coulding<sup>143</sup>, S Siddiqui<sup>143</sup>, O Mercer<sup>143</sup>, H Rehman<sup>143</sup>, D Potla<sup>143</sup>.

**Princess Royal Hospital, Telford and Royal Shrewsbury Hospital, Shrewsbury, UK** N Capps<sup>144</sup>, D Donaldson<sup>144</sup>, J Jones<sup>144</sup>, H Button<sup>144</sup>, T Martin<sup>144</sup>, K Hard<sup>144</sup>, A Agason<sup>144</sup>, L Tonks<sup>144</sup>, T Arden<sup>144</sup>, P Boyle<sup>144</sup>, M Carnahan<sup>144</sup>, J Strickley<sup>144</sup>, C Adams<sup>144</sup>, D Childs<sup>144</sup>, R Rikunenko<sup>144</sup>, M Leigh<sup>144</sup>, M Breekes<sup>144</sup>, R Wilcox<sup>144</sup>, A Bowes<sup>144</sup>, H Tiveran<sup>144</sup>, F Hurford<sup>144</sup>, J Summers<sup>144</sup>, A Carter<sup>144</sup>, Y Hussain<sup>144</sup>, L Ting<sup>144</sup>, A Javid<sup>144</sup>, N Motherwell<sup>144</sup>, H Moore<sup>144</sup>, H Millward<sup>144</sup>, S Jose<sup>144</sup>, N Schunki<sup>144</sup>, A Noakes<sup>144</sup>, C Clulow<sup>144</sup>.

**Arrowe Park Hospital, Wirral, UK** G Sadera<sup>145</sup>, R Jacob<sup>145</sup>, C Jones<sup>145</sup>.

**The Queen Elizabeth Hospital, King's Lynn, UK** M Blunt<sup>146</sup>, Z Coton<sup>146</sup>, H Curgenvin<sup>146</sup>, S Mohamed Ally<sup>146</sup>, K Beaumont<sup>146</sup>, M Elsaadany<sup>146</sup>, K Fernandes<sup>146</sup>, I Ali Mohamed Ali<sup>146</sup>, H Rangarajan<sup>146</sup>, V Sarathy<sup>146</sup>, S Selvanayagam<sup>146</sup>, D Vedage<sup>146</sup>, M White<sup>146</sup>.

**Royal Blackburn Teaching Hospital, Blackburn, UK** M Smith<sup>147</sup>, N Truman<sup>147</sup>, S Chukkambotla<sup>147</sup>, S Keith<sup>147</sup>, J Cockerill-Taylor<sup>147</sup>, J Ryan-Smith<sup>147</sup>, R Bolton<sup>147</sup>, P Springle<sup>147</sup>, J Dykes<sup>147</sup>, J Thomas<sup>147</sup>, M Khan<sup>147</sup>, M T Hijazi<sup>147</sup>, E Massey<sup>147</sup>, G Croston<sup>147</sup>.

**Poole Hospital, Poole, UK** H Reschreite r<sup>148</sup>, J Camsooksai<sup>148</sup>, S Patch<sup>148</sup>, S Jenkins<sup>148</sup>, C Humphrey<sup>148</sup>, B Wadams<sup>148</sup>, J Camsooksai<sup>148</sup>.

**Medway Maritime Hospital, Gillingham, UK** N Bhatia<sup>149</sup>, M Msiska<sup>149</sup>, O Adanini<sup>149</sup>.

**Warwick Hospital, Warwick, UK** B Attwood<sup>150</sup>, P Parsons<sup>150</sup>.

**The Royal Marsden Hospital, London, UK** K Tatham<sup>151</sup>, S Jhanji<sup>151</sup>, E Black<sup>151</sup>, A Dela Rosa<sup>151</sup>, R Howle<sup>151</sup>, B Thomas<sup>151</sup>, T Bemand<sup>151</sup>, R Raobaikady<sup>151</sup>.

**The Princess Alexandra Hospital, Harlow, UK** R Saha<sup>152</sup>, N Staines<sup>152</sup>, A Daniel<sup>152</sup>, J Finn<sup>152</sup>.

**Musgrove Park Hospital, Taunton, UK** J Hutter<sup>153</sup>, P Doble<sup>153</sup>, C Shovelton<sup>153</sup>, C Pawley<sup>153</sup>.

**George Eliot Hospital NHS Trust, Nuneaton, UK** T Kannan<sup>154</sup>, M Hill<sup>154</sup>.

**East Surrey Hospital, Redhill, UK** E Combes<sup>155</sup>, S Monnery<sup>155</sup>, T Joefield<sup>155</sup>.

**West Middlesex Hospital, Isleworth, UK** M Popescu<sup>156</sup>, M Thankachen<sup>156</sup>, M Oblak<sup>156</sup>.

**Warrington General Hospital, Warrington, UK** J Little<sup>157</sup>, S McIvor<sup>157</sup>, A Brady<sup>157</sup>, H Whittle<sup>157</sup>, H Prady<sup>157</sup>, R Chan<sup>157</sup>.

**Southport and Formby District General Hospital, Ormskirk, UK** A Ahmed<sup>158</sup>, A Morris<sup>158</sup>.

**Royal Devon and Exeter Hospital, Exeter, UK** C Gibson<sup>159</sup>, E Gordon<sup>159</sup>, S Keenan<sup>159</sup>, H Quinn<sup>159</sup>, S Benyon<sup>159</sup>, S Marriott<sup>159</sup>, L Zitter<sup>159</sup>, L Park<sup>159</sup>, K Baines<sup>159</sup>.

**Macclesfield District General Hospital, Macclesfield, UK** M Lyons<sup>160</sup>, M Holland<sup>160</sup>, N Keenan<sup>160</sup>, M Young<sup>160</sup>.

**Borders General Hospital, Melrose, UK** S Garrioch<sup>161</sup>, J Dawson<sup>161</sup>, M Tolson<sup>161</sup>.

**Birmingham Children's Hospital, Birmingham, UK** B Scholefield<sup>162</sup>, R Bi<sup>162</sup>.

**William Harvey Hospital, Ashford, UK** N Richardson<sup>163</sup>, N Schumacher<sup>163</sup>, T Cosier<sup>163</sup>, G Millen<sup>163</sup>.

**Royal Lancaster Infirmary, Lancaster, UK** A Higham<sup>164</sup>, K Simpson<sup>164</sup>.

**Queen Elizabeth the Queen Mother Hospital, Margate, UK** S Turki<sup>165</sup>, L Allen<sup>165</sup>, N Crisp<sup>165</sup>, T Hazleton<sup>165</sup>, A Knight<sup>165</sup>, J Deery<sup>165</sup>, C Price<sup>165</sup>, S Turney<sup>165</sup>, S Tilbey<sup>165</sup>, E Beranova<sup>165</sup>.

**Liverpool Heart and Chest Hospital, Liverpool, UK** D Wright<sup>166</sup>, L Georg<sup>166</sup>, S Twiss<sup>166</sup>.

**Darlington Memorial Hospital, Darlington, UK** A Cowton<sup>167</sup>, S Wadd<sup>167</sup>, K Postlethwaite<sup>167</sup>.

**Southend University Hospital, Westcliff-on-Sea, UK** P Gondo<sup>168</sup>, B Masunda<sup>168</sup>, A Kayani<sup>168</sup>, B Hadebe<sup>168</sup>.

**Raigmore Hospital, Inverness, UK** J Whiteside<sup>169</sup>, R Campbell<sup>169</sup>, N Clarke<sup>169</sup>.

**Salisbury District Hospital, Salisbury, UK** P Donnison<sup>170</sup>, F Trim<sup>170</sup>, I Leadbitter<sup>170</sup>.

**Peterborough City Hospital, Peterborough, UK** D Butcher<sup>171</sup>, S O'Sullivan<sup>171</sup>.

**Ipswich Hospital, Ipswich, UK** B Purewal<sup>172</sup>, B Purewal<sup>172</sup>, S Bell<sup>172</sup>, V Rivers<sup>172</sup>.

**Hereford County Hospital, Hereford, UK** R O'Leary<sup>173</sup>, J Birch<sup>173</sup>, E Collins<sup>173</sup>, S Anderson<sup>173</sup>, K Hammerton<sup>173</sup>, E Andrews<sup>173</sup>.

**Furness General Hospital, Barrow-in-Furness, UK** A Higham<sup>174</sup>, K Burns<sup>174</sup>.

**Forth Valley Royal Hospital, Falkirk, UK** I Edmond<sup>175</sup>, D Salutous<sup>175</sup>, A Todd<sup>175</sup>, J Donnachie<sup>175</sup>, P Turner<sup>175</sup>, L Prentice<sup>175</sup>, L Symon<sup>175</sup>, N Runciman<sup>175</sup>, F Auld<sup>175</sup>.

**Torbay Hospital, Torquay, UK** M Halkes<sup>176</sup>, P Mercer<sup>176</sup>, L Thornton<sup>176</sup>.

**St Mary's Hospital, Newport, UK** G Debreteni<sup>177</sup>, J Wilkins<sup>177</sup>, A Brown<sup>177</sup>, V Crickmore<sup>177</sup>.

**Royal Manchester Children's Hospital, Manchester, UK** G Subramanian<sup>178</sup>, R Marshall<sup>178</sup>, C Jennings<sup>178</sup>, M Latif<sup>178</sup>, L Bunni<sup>178</sup>.

**Royal Cornwall Hospital, Truro, UK** M Spivey<sup>179</sup>, S Bean<sup>179</sup>, K Burt<sup>179</sup>.

**Queen Elizabeth Hospital Gateshead, Gateshead, UK** V Linnett<sup>180</sup>, J Ritzema<sup>180</sup>, A Sanderson<sup>180</sup>, W McCormick<sup>180</sup>, M Bokhari<sup>180</sup>.

**Kent & Canterbury Hospital, Canterbury, UK** R Kapoor<sup>181</sup>, D Loader<sup>181</sup>.

**James Paget University Hospital NHS Trust, Great Yarmouth, UK** A Ayers<sup>182</sup>, W Harrison<sup>182</sup>, J North<sup>182</sup>.

**Darent Valley Hospital, Dartford, UK** Z Belagodu<sup>183</sup>, R Parasomthy<sup>183</sup>, O Olufuwa<sup>183</sup>, A Gherman<sup>183</sup>, B Fuller<sup>183</sup>, C Stuart<sup>183</sup>.

**The Alexandra Hospital, Redditch and Worcester Royal Hospital, Worcester, UK** O Kelsall<sup>184</sup>, C Davis<sup>184</sup>, L Wild<sup>184</sup>, H Wood<sup>184</sup>, J Thrush<sup>184</sup>, A Durie<sup>184</sup>, K Austin<sup>184</sup>, K Archer<sup>184</sup>, P Anderson<sup>184</sup>, C Vigers<sup>184</sup>.

**Ysbyty Gwynedd, Bangor, UK** C Thorpe<sup>185</sup>, A Thomas<sup>185</sup>, E Knights<sup>185</sup>, N Boyle<sup>185</sup>, A Price<sup>185</sup>.

**Yeovil Hospital, Yeovil, UK** A Kubisz-Pudelko<sup>186</sup>, D Wood<sup>186</sup>, A Lewis<sup>186</sup>, S Board<sup>186</sup>, L Pippard<sup>186</sup>, J Perry<sup>186</sup>, K Beesley<sup>186</sup>.



**University Hospital Hairmyres, East Kilbride, UK** A Rattray<sup>187</sup>, M Taylor<sup>187</sup>, E Lee<sup>187</sup>, L Lennon<sup>187</sup>, K Douglas<sup>187</sup>, D Bell<sup>187</sup>, R Boyle<sup>187</sup>, L Glass<sup>187</sup>.

**Scunthorpe General Hospital, Scunthorpe, UK** M Nauman Akhtar<sup>188</sup>, K Dent<sup>188</sup>, D Potoczna<sup>188</sup>, S Pearson<sup>188</sup>, E Horsley<sup>188</sup>, S Spencer<sup>188</sup>.

**Princess Royal Hospital Brighton, West Sussex, UK** C Phillips<sup>189</sup>, D Mullan<sup>189</sup>, D Skinner<sup>189</sup>, J Gaylard<sup>189</sup>, L Ortiz-Ruizdegordoa<sup>189</sup>.

**Lincoln County Hospital, Lincoln, UK** R Barber<sup>190</sup>, C Hewitt<sup>190</sup>, A Hilldrith<sup>190</sup>, S Shepardson<sup>190</sup>, M Wills<sup>190</sup>, K Jackson-Lawrence<sup>190</sup>.

**Homerton University Hospital, London, UK** A Gupta<sup>191</sup>, A Easthope<sup>191</sup>, E Timlick<sup>191</sup>, C Gorman<sup>191</sup>.

**Glangwili General Hospital, Camarthen, UK** I Otaha<sup>192</sup>, A Gales<sup>192</sup>, S Coetzee<sup>192</sup>, M Raj<sup>192</sup>, M Peiu<sup>192</sup>.

**Ealing Hospital, Southall, UK** V Parris<sup>193</sup>, S Quaid<sup>193</sup>, E Watson<sup>193</sup>.

**Scarborough General Hospital, Scarborough, UK** K Elliott<sup>194</sup>, J Mallinson<sup>194</sup>, B Chandler<sup>194</sup>, A Turnbull<sup>194</sup>.

**Royal Albert Edward Infirmary, Wigan, UK** A Quinn<sup>195</sup>, C Finch<sup>195</sup>, C Holl<sup>195</sup>, J Cooper<sup>195</sup>, A Evans<sup>195</sup>.

**Queen Elizabeth Hospital, Woolwich, London, UK** W Khaliq<sup>196</sup>, A Collins<sup>196</sup>, E Treus Gude<sup>196</sup>.

**North Devon District Hospital, Barnstaple, UK** N Love<sup>197</sup>, L van Koutrik<sup>197</sup>, J Hunt<sup>197</sup>, D Kaye<sup>197</sup>, E Fisher<sup>197</sup>, A Brayne<sup>197</sup>, V Tuckey<sup>197</sup>, P Jackson<sup>197</sup>, J Parkin<sup>197</sup>.

**National Hospital for Neurology and Neurosurgery, London, UK** D Brealey<sup>198</sup>, E Raith<sup>198</sup>, A Tariq<sup>198</sup>, H Houlden<sup>198</sup>, A Tucci<sup>198</sup>, J Hardy<sup>198</sup>, E Moncur<sup>198</sup>.

**Eastbourne District General Hospital, East Sussex, UK and Conquest Hospital, East Sussex, UK** J Highgate<sup>199</sup>, A Cowley<sup>199</sup>.

**Diana Princess of Wales Hospital, Grimsby, UK** A Mitra<sup>200</sup>, R Stead<sup>200</sup>, T Behan<sup>200</sup>, C Burnett<sup>200</sup>, M Newton<sup>200</sup>, E Heaney<sup>200</sup>, R Pollard<sup>200</sup>, J Hatton<sup>200</sup>.

**The Christie NHS Foundation Trust, Manchester, UK** A Patel<sup>201</sup>, V Kasipandian<sup>201</sup>, S Allibone<sup>201</sup>, R M Genetu<sup>201</sup>.

**Prince Philip Hospital, Lianelli, UK** I Otahal<sup>202</sup>, L O'Brien<sup>202</sup>, Z Omar<sup>202</sup>, E Perkins<sup>202</sup>, K Davies<sup>202</sup>.

**Prince Charles Hospital, Merthyr Tydfil, UK** D Tetla<sup>203</sup>, C Potheary<sup>203</sup>, B Deacon<sup>203</sup>.

**Golden Jubilee National Hospital, Clydebank, UK** B Shelley<sup>204</sup>, V Irvine<sup>204</sup>.

**Dorset County Hospital, Dorchester, UK** S Williams<sup>205</sup>, P Williams<sup>205</sup>, J Birch<sup>205</sup>, J Goodsell<sup>205</sup>, R Tutton<sup>205</sup>, L Bough<sup>205</sup>, B Winter-Goodwin<sup>205</sup>.

**Calderdale Royal Hospital, Halifax, UK** R Kitson<sup>206</sup>, J Pinnell<sup>206</sup>, A Wilson<sup>206</sup>, T Nortcliffe<sup>206</sup>, T Wood<sup>206</sup>, M Home<sup>206</sup>, K Holdroyd<sup>206</sup>, M Robinson<sup>206</sup>, KHanson<sup>206</sup>, R Shaw<sup>206</sup>, J Greig<sup>206</sup>, M Brady<sup>206</sup>, A Haigh<sup>206</sup>, L Matupe<sup>206</sup>, M Usher<sup>206</sup>, S Mellor<sup>206</sup>, S Dale<sup>206</sup>, L Gledhill<sup>206</sup>, L Shaw<sup>206</sup>, G Turner<sup>206</sup>, D Kelly<sup>206</sup>, B Anwar<sup>206</sup>, H Riley<sup>206</sup>, H Sturgeon<sup>206</sup>, A Ali<sup>206</sup>, L Thomas<sup>206</sup>, D Melia<sup>206</sup>, A Dance<sup>206</sup>, K Hanson<sup>206</sup>.

**West Suffolk Hospital, Suffolk, UK** S Humphreys<sup>207</sup>, I Frost<sup>207</sup>, V Gopal<sup>207</sup>, J Godden<sup>207</sup>, A Holden<sup>207</sup>, S Swann<sup>207</sup>.

**West Cumberland Hospital, Whitehaven, UK** T Smith<sup>208</sup>, M Clapham<sup>208</sup>, U Poultney<sup>208</sup>, R Harper<sup>208</sup>, P Rice<sup>208</sup>.

**University Hospital Lewisham, London, UK** W Khaliq<sup>209</sup>, R Reece-Anthony<sup>209</sup>, B Gurung<sup>209</sup>.

**St John's Hospital Livingston, Livingston, UK** S Moultrie<sup>210</sup>, M Odam<sup>210</sup>.

**Sheffield Children's Hospital, Sheffield, UK** A Mayer<sup>211</sup>, A Bellini<sup>211</sup>, A Pickard<sup>211</sup>, J Bryant<sup>211</sup>, N Roe<sup>211</sup>, J Sowter<sup>211</sup>.

**Hinchingbrooke Hospital, Huntingdon, UK** D Butcher<sup>212</sup>, K Lang<sup>212</sup>, J Taylor<sup>212</sup>.

**Glenfield Hospital, Leicester, UK** P Barry<sup>213</sup>.

**Bronglais General Hospital, Aberystwyth, UK** M Hobrok<sup>214</sup>, H Tench<sup>214</sup>, R Wolf-Roberts<sup>214</sup>, H McGuinness<sup>214</sup>, R Loosley<sup>214</sup>.

**Alder Hey Children's Hospital, Liverpool, UK** D Hawcutt<sup>215</sup>, L Rad<sup>215</sup>, L O'Malley<sup>215</sup>, P Saunderson<sup>215</sup>, G Seddon<sup>215</sup>, T Anderson<sup>215</sup>, N Rogers<sup>215</sup>.

**University Hospital Monklands, Airdrie, UK** J Ruddy<sup>216</sup>, Margaret H<sup>216</sup>, M Taylor<sup>216</sup>, C Beith<sup>216</sup>, A McAlpine<sup>216</sup>, L Ferguson<sup>216</sup>, P Grant<sup>216</sup>, S MacFadyen<sup>216</sup>, M McLaughlin<sup>216</sup>, T Baird<sup>216</sup>, S Rundell<sup>216</sup>, L Glass<sup>216</sup>, B Welsh<sup>216</sup>, R Hamill<sup>216</sup>, F Fisher<sup>216</sup>.

**Cumberland Infirmary, Carlisle, UK** T Smith<sup>217</sup>, J Gregory<sup>217</sup>, A Brown<sup>217</sup>.

<sup>1</sup>Roslin Institute, University of Edinburgh, Easter Bush, Edinburgh, EH25 9RG, UK

<sup>21</sup>Centre for Tropical Medicine and Global Health, Nuffield Department of Medicine, University of Oxford, Old Road Campus, Roosevelt Drive, Oxford, OX3 7FZ, UK

<sup>14</sup>Wellcome Centre for Human Genetics, University of Oxford, Oxford, UK

<sup>29</sup>UCL Centre for Human Health and Performance, London, W1T 7HA, UK

<sup>25</sup>Department of Critical Care Medicine, Queen's University and Kingston Health Sciences Centre, Kingston, ON, Canada

<sup>26</sup>Department of Anaesthesia and Intensive Care, The Chinese University of Hong Kong, Prince of Wales Hospital, Hong Kong, China

<sup>22</sup>Clinical Research Centre at St Vincent's University Hospital, University College Dublin, Dublin, Ireland

<sup>15</sup>Department of Medicine, University of Cambridge, Cambridge, UK

<sup>11</sup>Intensive Care Unit, Royal Infirmary of Edinburgh, 54 Little France Drive, Edinburgh, EH16 5SA, UK

<sup>20</sup>William Harvey Research Institute, Barts and the London School of Medicine and Dentistry, Queen Mary University of London, London EC1M 6BQ, UK

<sup>18</sup>NIHR Health Protection Research Unit for Emerging and Zoonotic Infections, Institute of Infection, Veterinary and Ecological Sciences University of Liverpool, Liverpool, L69 7BE, UK

<sup>38</sup>Respiratory Medicine, Alder Hey Children's Hospital, Institute in The Park, University of Liverpool, Alder Hey Children's Hospital, Liverpool, UK

<sup>36</sup>National Heart and Lung Institute, Imperial College London, London, UK

<sup>37</sup>Imperial College Healthcare NHS Trust: London, London, UK

<sup>16</sup>Department of Intensive Care Medicine, Guy's and St. Thomas NHS Foundation Trust, London, UK

<sup>19</sup>MRC-University of Glasgow Centre for Virus Research, Institute of Infection, Immunity and Inflammation, College of Medical, Veterinary and Life Sciences, University of Glasgow, Glasgow, UK

<sup>27</sup>Wellcome-Wolfson Institute for Experimental Medicine, Queen's University Belfast, Belfast, Northern Ireland, UK

<sup>28</sup>Department of Intensive Care Medicine, Royal Victoria Hospital, Belfast, Northern Ireland, UK

- <sup>2</sup>MRC Human Genetics Unit, Institute of Genetics and Molecular Medicine, University of Edinburgh, Western General Hospital, Crewe Road, Edinburgh, EH4 2XU, UK
- <sup>7</sup>Intensive Care National Audit & Research Centre, London, UK
- <sup>6</sup>Edinburgh Clinical Research Facility, Western General Hospital, University of Edinburgh, EH4 2XU, UK
- <sup>3</sup>Genomics England, London, UK
- <sup>4</sup>Centre for Inflammation Research, The Queen's Medical Research Institute, University of Edinburgh, 47 Little France Crescent, Edinburgh, UK
- <sup>5</sup>Centre for Genomic and Experimental Medicine, Institute of Genetics and Molecular Medicine, University of Edinburgh, Western General Hospital, Crewe Road, Edinburgh, EH4 2XU, UK
- <sup>8</sup>Institute for Molecular Bioscience, The University of Queensland, Brisbane, Australia
- <sup>9</sup>Biostatistics Group, School of Life Sciences, Sun Yat-sen University, Guangzhou, China
- <sup>12</sup>School of Life Sciences, Westlake University, Hangzhou, Zhejiang 310024, China
- <sup>13</sup>Westlake Laboratory of Life Sciences and Biomedicine, Hangzhou, Zhejiang 310024, China
- <sup>33</sup>Centre for Global Health Research, Usher Institute of Population Health Sciences and Informatics, Teviot Place, Edinburgh EH8 9AG, UK
- <sup>34</sup>Department of Medical Epidemiology and Biostatistics, Karolinska Institutet, Stockholm, Sweden
- <sup>39</sup>Barts Health NHS Trust, London, UK
- <sup>40</sup>Guys and St Thomas' Hospital, London, UK
- <sup>41</sup>James Cook University Hospital, Middlesbrough, UK
- <sup>42</sup>The Royal Liverpool University Hospital, Liverpool, UK
- <sup>43</sup>King's College Hospital, London, UK
- <sup>44</sup>Royal Infirmary of Edinburgh, Edinburgh, UK
- <sup>45</sup>John Radcliffe Hospital, Oxford, UK
- <sup>46</sup>Addenbrooke's Hospital, Cambridge, UK
- <sup>47</sup>Morrison Hospital, Swansea, UK
- <sup>48</sup>Ashford and St Peter's Hospital, Surrey, UK
- <sup>49</sup>Royal Stoke University Hospital, Staffordshire, UK
- <sup>50</sup>Queen Elizabeth Hospital, Birmingham, UK
- <sup>51</sup>Glasgow Royal Infirmary, Glasgow, UK
- <sup>52</sup>Kingston Hospital, Surrey, UK
- <sup>53</sup>The Tunbridge Wells Hospital and Maidstone Hospital, Kent, UK
- <sup>54</sup>North Middlesex University Hospital NHS trust, London, UK
- <sup>55</sup>Bradford Royal Infirmary, Bradford, UK
- <sup>56</sup>Blackpool Victoria Hospital, Blackpool, UK
- <sup>57</sup>Countess of Chester Hospital, Chester, UK
- <sup>58</sup>Wythenshawe Hospital, Manchester, UK
- <sup>59</sup>St George's Hospital, London, UK
- <sup>60</sup>Good Hope Hospital, Birmingham, UK
- <sup>61</sup>Stepping Hill Hospital, Stockport, UK
- <sup>62</sup>Manchester Royal Infirmary, Manchester, UK
- <sup>63</sup>Royal Alexandra Hospital, Paisley, UK
- <sup>64</sup>Queen Elizabeth University Hospital, Glasgow, UK
- <sup>65</sup>Queen Alexandra Hospital, Portsmouth, UK
- <sup>66</sup>BHRUT (Barking Havering) - Queens Hospital and King George Hospital, Essex, UK
- <sup>67</sup>University College Hospital, London, UK
- <sup>68</sup>Royal Victoria Infirmary, Newcastle Upon Tyne, UK
- <sup>69</sup>Western Sussex Hospitals, West Sussex, UK
- <sup>70</sup>Salford Royal Hospital, Manchester, UK
- <sup>71</sup>The Royal Oldham Hospital, Manchester, UK
- <sup>72</sup>Pinderfields General Hospital, Wakefield, UK
- <sup>73</sup>Basildon Hospital, Basildon, UK
- <sup>74</sup>University Hospital of Wales, Cardiff, UK
- <sup>75</sup>Broomfield Hospital, Chelmsford, UK
- <sup>76</sup>Royal Brompton Hospital, London, UK
- <sup>77</sup>Nottingham University Hospital, Nottingham, UK
- <sup>78</sup>Royal Hallamshire Hospital and Northern General Hospital, Sheffield, UK

- <sup>79</sup>Royal Hampshire County Hospital, Hampshire, UK  
<sup>80</sup>Queens Hospital Burton, Burton-On-Trent, UK  
<sup>81</sup>New Cross Hospital, Wolverhampton, UK  
<sup>82</sup>Heartlands Hospital, Birmingham, UK  
<sup>83</sup>Walsall Manor Hospital, Walsall, UK  
<sup>84</sup>Stoke Mandeville Hospital, Buckinghamshire, UK  
<sup>85</sup>Sandwell General Hospital, Birmingham, UK  
<sup>86</sup>Royal Berkshire NHS Foundation Trust, Berkshire, UK  
<sup>87</sup>Charing Cross Hospital, St Mary's Hospital and Hammersmith Hospital, London, UK  
<sup>88</sup>Dumfries and Galloway Royal Infirmary, Dumfries, UK  
<sup>89</sup>Bristol Royal Infirmary, Bristol, UK  
<sup>90</sup>Royal Sussex County Hospital, Brighton, UK  
<sup>91</sup>Whiston Hospital, Prescot, UK  
<sup>92</sup>Royal Glamorgan Hospital, Cardiff, UK  
<sup>93</sup>King's Mill Hospital, Nottingham, UK  
<sup>94</sup>Fairfield General Hospital, Bury, UK  
<sup>95</sup>Western General Hospital, Edinburgh, UK  
<sup>96</sup>Northwick Park Hospital, London, UK  
<sup>97</sup>Royal Preston Hospital, Preston, UK  
<sup>98</sup>Royal Derby Hospital, Derby, UK  
<sup>99</sup>Sunderland Royal Hospital, Sunderland, UK  
<sup>100</sup>Royal Surrey County Hospital, Guildford, UK  
<sup>101</sup>Derriford Hospital, Plymouth, UK  
<sup>102</sup>Croydon University Hospital, Croydon, UK  
<sup>103</sup>Victoria Hospital, Kirkcaldy, UK  
<sup>104</sup>Milton Keynes University Hospital, Milton Keynes, UK  
<sup>105</sup>Barnsley Hospital, Barnsley, UK  
<sup>106</sup>York Hospital, York, UK  
<sup>107</sup>University Hospital of North Tees, Stockton on Tees, UK  
<sup>108</sup>University Hospital Wishaw, Wishaw, UK  
<sup>109</sup>Whittington Hospital, London, UK  
<sup>110</sup>Southmead Hospital, Bristol, UK  
<sup>111</sup>The Royal Papworth Hospital, Cambridge, UK  
<sup>112</sup>Royal Gwent Hospital, Newport, UK  
<sup>113</sup>Norfolk and Norwich University hospital (NNUH), Norwich, UK  
<sup>114</sup>Great Ormond St Hospital and UCL Great Ormond St Institute of Child Health NIHR Biomedical Research Centre, London, UK  
<sup>115</sup>Airedale General Hospital, Keighley, UK  
<sup>116</sup>Aberdeen Royal Infirmary, Aberdeen, UK  
<sup>117</sup>Southampton General Hospital, Southampton, UK  
<sup>118</sup>Russell's Hall Hospital, Dudley, UK  
<sup>119</sup>Rotherham General Hospital, Rotherham, UK  
<sup>120</sup>North Manchester General Hospital, Manchester, UK  
<sup>121</sup>Basingstoke and North Hampshire Hospital, Basingstoke, UK  
<sup>122</sup>Royal Free Hospital, London, UK  
<sup>123</sup>Hull Royal Infirmary, Hull, UK  
<sup>124</sup>Harefield Hospital, London, UK  
<sup>125</sup>Chesterfield Royal Hospital Foundation Trust, Chesterfield, UK  
<sup>126</sup>Barnet Hospital, London, UK  
<sup>127</sup>Aintree University Hospital, Liverpool, UK  
<sup>128</sup>St James's University Hospital and Leeds General Infirmary, Leeds, UK  
<sup>129</sup>Glan Clwyd Hospital, Bodelwyddan, UK  
<sup>130</sup>University Hospital Crosshouse, Kilmarnock, UK  
<sup>131</sup>Royal Bolton Hospital, Bolton, UK  
<sup>132</sup>Princess of Wales Hospital, Llantrisant, UK  
<sup>133</sup>Pilgrim Hospital, Lincoln, UK

- 134 Northumbria Healthcare NHS Foundation Trust, North Shields, UK
- 135 Ninewells Hospital, Dundee, UK
- 136 Lister Hospital, Stevenage, UK
- 137 Bedford Hospital, Bedford, UK
- 138 Royal United Hospital, Bath, UK
- 139 Royal Bournemouth Hospital, Bournemouth, UK
- 140 The Great Western Hospital, Swindon, UK
- 141 Watford General Hospital, Watford, UK
- 142 University Hospital North Durham, Darlington, UK
- 143 Tameside General Hospital, Ashton Under Lyne, UK
- 144 Princess Royal Hospital Shrewsbury and Royal Shrewsbury Hospital, Shrewsbury, UK
- 145 Arrowe Park Hospital, Wirral, UK
- 146 The Queen Elizabeth Hospital, King's Lynn, UK
- 147 Royal Blackburn Teaching Hospital, Blackburn, UK
- 148 Poole Hospital, Poole, UK
- 149 Medway Maritime Hospital, Gillingham, UK
- 150 Warwick Hospital, Warwick, UK
- 151 The Royal Marsden Hospital, London, UK
- 152 The Princess Alexandra Hospital, Harlow, UK
- 153 Musgrove Park Hospital, Taunton, UK
- 154 George Eliot Hospital NHS Trust, Nuneaton, UK
- 155 East Surrey Hospital, Redhill, UK
- 156 West Middlesex Hospital, Isleworth, UK
- 157 Warrington General Hospital, Warrington, UK
- 158 Southport and Formby District General Hospital, Ormskirk, UK
- 159 Royal Devon and Exeter Hospital, Exeter, UK
- 160 Macclesfield District General Hospital, Macclesfield, UK
- 161 Borders General Hospital, Melrose, UK
- 162 Birmingham Children's Hospital, Birmingham, UK
- 163 William Harvey Hospital, Ashford, UK
- 164 Royal Lancaster Infirmary, Lancaster, UK
- 165 Queen Elizabeth the Queen Mother Hospital, Margate, UK
- 166 Liverpool Heart and Chest Hospital, Liverpool, UK
- 167 Darlington Memorial Hospital, Darlington, UK
- 168 Southend University Hospital, Westcliff-on-Sea, UK
- 169 Raigmore Hospital, Inverness, UK
- 170 Salisbury District Hospital, Salisbury, UK
- 171 Peterborough City Hospital, Peterborough, UK
- 172 Ipswich Hospital, Ipswich, UK
- 173 Hereford County Hospital, Worcester, UK
- 174 Furness General Hospital, Barrow-in-Furness, UK
- 175 Forth Valley Royal Hospital, Falkirk, UK
- 176 Torbay Hospital, Torquay, UK
- 177 St Mary's Hospital, Newport, UK
- 178 Royal Manchester Children's Hospital, Manchester, UK
- 179 Royal Cornwall Hospital, Truro, UK
- 180 Queen Elizabeth Hospital Gateshead, Gateshead, UK
- 181 Kent & Canterbury Hospital, Canterbury, UK
- 182 James Paget University Hospital NHS Trust, Great Yarmouth, UK
- 183 Darent Valley Hospital, Dartford, UK
- 184 The Alexandra Hospital, Redditch and Worcester Royal Hospital, Worcester, UK
- 185 Ysbyty Gwynedd, Bangor, UK
- 186 Yeovil Hospital, Yeovil, UK
- 187 University Hospital Hairmyres, East Kilbride, UK
- 188 Scunthorpe General Hospital, Scunthorpe, UK
- 189 Princess Royal Hospital Brighton, West Sussex, UK

- <sup>190</sup>Lincoln County Hospital, Lincoln, UK  
<sup>191</sup>Homerton University Hospital, London, UK  
<sup>192</sup>Glangwili General Hospital, Camarthen, UK  
<sup>193</sup>Ealing Hospital, Southall, UK  
<sup>194</sup>Scarborough General Hospital, Scarborough, UK  
<sup>195</sup>Royal Albert Edward Infirmary, Wigan, UK  
<sup>196</sup>Queen Elizabeth Hospital, Woolwich, London, UK  
<sup>197</sup>North Devon District Hospital, Barnstaple, UK  
<sup>198</sup>National Hospital for Neurology and Neurosurgery, London, UK  
<sup>199</sup>Eastbourne District General Hospital, East Sussex, UK and Conquest Hospital, East Sussex, UK  
<sup>200</sup>Diana Princess of Wales Hospital, Grimsby, UK  
<sup>201</sup>The Christie NHS Foundation Trust, Manchester, UK  
<sup>202</sup>Prince Philip Hospital, Lianelli, UK  
<sup>203</sup>Prince Charles Hospital, Merthyr Tydfil, UK  
<sup>204</sup>Golden Jubilee National Hospital, Clydebank, UK  
<sup>205</sup>Dorset County Hospital, Dorchester, UK  
<sup>206</sup>Calderdale Royal Hospital, Halifax, UK  
<sup>207</sup>West Suffolk Hospital, Suffolk, UK  
<sup>208</sup>West Cumberland Hospital, Whitehaven, UK  
<sup>209</sup>University Hospital Lewisham, London, UK  
<sup>210</sup>St John's Hospital Livingston, Livingston, UK  
<sup>211</sup>Sheffield Children's Hospital, Sheffield, UK  
<sup>212</sup>Hinchingbrooke Hospital, Huntingdon, UK  
<sup>213</sup>Glenfield Hospital, Leicester, UK  
<sup>214</sup>Bronglais General Hospital, Aberystwyth, UK  
<sup>215</sup>Alder Hey Children's Hospital, Liverpool, UK  
<sup>216</sup>University Hospital Monklands, Airdrie, UK  
<sup>217</sup>Cumberland Infirmary, Carlisle, UK

## ISARIC4C

*Consortium Lead Investigator:* J Kenneth Baillie, *Chief Investigator:* Malcolm G Semple, *Co-Lead Investigator:* Peter JM Openshaw. *ISARIC Clinical Coordinator:* Gail Carson.

*Co-Investigators:* Beatrice Alex, Benjamin Bach, Wendy S Barclay, Debby Bogaert, Meera Chand, Graham S Cooke, Annemarie B Docherty, Jake Dunning, Ana da Silva Filipe, Tom Fletcher, Christopher A Green, Ewen M Harrison, Julian A Hiscox, Antonia Ying Wai Ho, Peter W Horby, Samreen Ijaz, Saye Khoo, Paul Klenerman, Andrew Law, Wei Shen Lim, Alexander J Mentzer, Laura Merson, Alison M Meynert, Mahdad Noursadeghi, Shona C Moore, Massimo Palmarini, William A Paxton, Georgios Pollakis, Nicholas Price, Andrew Rambaut, David L Robertson, Clark D Russell, Vanessa Sancho-Shimizu, Janet T Scott, Thushan de Silva, Louise Sigfrid, Tom Solomon, Shiranee Sriskandan, David Stuart, Charlotte Summers, Richard S Tedder, Emma C Thomson, AA Roger Thompson, Ryan S Thwaites, Lance CW Turtle, Maria Zambon.

*Project Managers:* Hayley Hardwick, Chloe Donohue, Ruth Lyons, Fiona Griffiths, Wilna Oosthuyzen.

*Data Analysts:* Lisa Norman, Riinu Pius, Tom M Drake, Cameron J Fairfield, Stephen Knight, Kenneth A Mclean, Derek Murphy, Catherine A Shaw.

*Data and Information System Manager:* Jo Dalton, Michelle Girvan, Egle Saviciute, Stephanie Roberts, Janet Harrison, Laura Marsh, Marie Connor, Sophie Halpin, Clare Jackson, Carrol Gamble.

*Data integration and presentation:* Gary Leeming, Andrew Law, Murray Wham, Sara Clohisey, Ross Hendry, James Scott-Brown.

*Material Management:* William Greenhalf, Victoria Shaw, Sarah McDonald.

*Patient engagement:* Seán Keating

*Outbreak Laboratory Volunteers:* Katie A. Ahmed, Jane A Armstrong, Milton Ashworth, Innocent G Asimwe, Siddharth Bakshi, Samantha L Barlow, Laura Booth, Benjamin Brennan, Katie Bullock, Benjamin WA Catterall, Jordan J Clark, Emily A Clarke, Sarah Cole, Louise Cooper, Helen Cox, Christopher Davis, Oslem Dincarslan,

Chris Dunn, Philip Dyer, Angela Elliott, Anthony Evans, Lewis WS Fisher, Terry Foster, Isabel Garcia-Dorival, William Greenhalf, Philip Gunning, Catherine Hartley, Antonia Ho, Rebecca L Jensen, Christopher B Jones, Trevor R Jones, Shadia Khandaker, Katharine King, Robyn T. Kiy, Chrysa Koukorava, Annette Lake, Suzannah Lant, Diane Latawiec, L Lavelle-Langham, Daniella Lefteri, Lauren Lett, Lucia A Livoti, Maria Mancini, Sarah McDonald, Laurence McEvoy, John McLaughlan, Soeren Metelmann, Nahida S Miah, Joanna Middleton, Joyce Mitchell, Shona C Moore, Ellen G Murphy, Rebekah Penrice-Randal, Jack Pilgrim, Tessa Prince, Will Reynolds, P. Matthew Ridley, Debby Sales, Victoria E Shaw, Rebecca K Shears, Benjamin Small, Krishanthi S Subramaniam, Agnieska Szemiel, Aislynn Taggart, Jolanta Tanianis-Hughes, Jordan Thomas, Erwan Trochu, Libby van Tonder, Eve Wilcock, J. Eunice Zhang.

*Local Principal Investigators:* Kayode Adeniji, Daniel Agranoff, Ken Agwuh, Dhiraj Ail, Ana Alegria, Brian Angus, Abdul Ashish, Dougal Atkinson, Shahedal Bari, Gavin Barlow, Stella Barnass, Nicholas Barrett, Christopher Bassford, David Baxter, Michael Beadsworth, Jolanta Bernatoniene, John Berridge, Nicola Best, Pieter Bothma, David Brealey, Robin Brittain-Long, Naomi Bulteel, Tom Burden, Andrew Burtenshaw, Vikki Caruth, David Chadwick, Duncan Chambler, Nigel Chee, Jenny Child, Srikanth Chukkambotla, Tom Clark, Paul Collini, Catherine Cosgrove, Jason Cupitt, Maria-Teresa Cutino-Moguel, Paul Dark, Chris Dawson, Samir Dervisevic, Phil Donnison, Sam Douthwaite, Ingrid DuRand, Ahilanadan Dushianthan, Tristan Dyer, Cariad Evans, Chi Eziefula, Chrisopher Fegan, Adam Finn, Duncan Fullerton, Sanjeev Garg, Sanjeev Garg, Atul Garg, Effrossyni Gkrania-Klotsas, Jo Godden, Arthur Goldsmith, Clive Graham, Elaine Hardy, Stuart Hartshorn, Daniel Harvey, Peter Havalda, Daniel B Hawcutt, Maria Hobrok, Luke Hodgson, Anita Holme, Anil Hormis, Michael Jacobs, Susan Jain, Paul Jennings, Agilan Kaliappan, Vidya Kasipandian, Stephen Kegg, Michael Kelsey, Jason Kendall, Caroline Kerrison, Ian Kerslake, Oliver Koch, Gouri Koduri, George Koshy, Shondipon Laha, Steven Laird, Susan Larkin, Tamas Leiner, Patrick Lillie, James Limb, Vanessa Linnett, Jeff Little, Michael MacMahon, Emily MacNaughton, Ravish Mankregod, Huw Masson, Elijah Matovu, Katherine McCullough, Ruth McEwen, Manjula Meda, Gary Mills, Jane Minton, Mariyam Mirfenderesky, Kavya Mohandas, Quen Mok, James Moon, Elinoor Moore, Patrick Morgan, Craig Morris, Katherine Mortimore, Samuel Moses, Mbiye Mpenge, Rohinton Mulla, Michael Murphy, Megan Nagel, Thapas Nagarajan, Mark Nelson, Igor Otahal, Mark Pais, Selva Panchatsharam, Hassan Paraiso, Brij Patel, Justin Pepperell, Mark Peters, Mandeep Phull, Stefania Pintus, Jagtur Singh Pooni, Frank Post, David Price, Rachel Prout, Nikolas Rae, Henrik Reschreiter, Tim Reynolds, Neil Richardson, Mark Roberts, Devender Roberts, Alistair Rose, Guy Rousseau, Brendan Ryan, Taranprit Saluja, Aarti Shah, Prad Shanmuga, Anil Sharma, Anna Shawcross, Jeremy Sizer, Manu Shankar-Hari, Richard Smith, Catherine Snelson, Nick Spittle, Nikki Staines, Tom Stambach, Richard Stewart, Pradeep Subudhi, Tamas Szakmany, Kate Tatham, Jo Thomas, Chris Thompson, Robert Thompson, Ascanio Tridente, Darell Tupper-Carey, Mary Twagira, Andrew Ustianowski, Nick Vallotton, Lisa Vincent-Smith, Shico Visuvanathan, Alan Vuylsteke, Sam Waddy, Rachel Wake, Andrew Walden, Ingeborg Welters, Tony Whitehouse, Paul Whittaker, Ashley Whittington, Meme Wijesinghe, Martin Williams, Lawrence Wilson, Sarah Wilson, Stephen Winchester, Martin Wiselka, Adam Wolverson, Daniel G Wooton, Andrew Workman, Bryan Yates, and Peter Young.

This work uses data provided by patients and collected by the NHS as part of their care and support #DataSavesLives. We are extremely grateful to the 2,648 frontline NHS clinical and research staff and volunteer medical students, who collected this data in challenging circumstances; and the generosity of the participants and their families for their individual contributions in these difficult times. We also acknowledge the support of Jeremy J Farrar, Nahoko Shindo, Devika Dixit, Nipunie Rajapakse, Lyndsey Castle, Martha Buckley, Debbie Malden, Katherine Newell, Kwame O'Neill, Emmanuelle Denis, Claire Petersen, Scott Mullaney, Sue MacFarlane, Nicole Maziere, Julien Martinez, Oslem Dincarslan, and Annette Lake.

## GEN-COVID

Francesca Mari<sup>31,32</sup>, Sergio Daga<sup>31</sup>, Margherita Baldassarri<sup>31</sup>, Elisa Benetti<sup>225</sup>, Simone Furini<sup>225</sup>, Chiara Fallerini<sup>31</sup>, Francesca Fava<sup>31,32</sup>, Floriana Valentino<sup>31</sup>, Gabriella Doddato<sup>31</sup>, Annarita Giliberti<sup>31</sup>, Rossella Tita<sup>32</sup>, Sara Amitrano<sup>32</sup>, Mirella Bruttini<sup>31,32</sup>, Susanna Croci<sup>31</sup>, Iliaria Meloni<sup>31</sup>, Anna Maria Pinto<sup>32</sup>, Elisa Frullanti<sup>31</sup>, Iliaria Meloni<sup>31</sup>, Maria Antonietta Mencarelli<sup>32</sup>, Caterina Lo Rizzo<sup>32</sup>, Francesca Montagnani<sup>226</sup>, Laura Di Sarno<sup>31</sup>, Andrea Tommasi<sup>31,32</sup>, Maria Palmieri<sup>31</sup>, Arianna Emiliozzi<sup>226</sup>, Massimiliano Fabbiani<sup>226</sup>, Barbara Rossetti<sup>226</sup>, Giacomo Zanelli<sup>226</sup>, Elena Bargagli<sup>227</sup>, Laura Bergantini<sup>227</sup>, Miriana D'Alessandro<sup>227</sup>, Paolo Cameli<sup>227</sup>, David Bennet<sup>227</sup>, Federico Anedda<sup>228</sup>, Simona Marcantonio<sup>228</sup>, Sabino Scolletta<sup>228</sup>, Federico Franchi<sup>228</sup>, Maria Antonietta Mazzei<sup>229</sup>, Susanna Guerrini<sup>229</sup>, Edoardo Conticini<sup>230</sup>, Luca Cantarini<sup>230</sup>, Bruno Frediani<sup>230</sup>, Danilo Tacconi<sup>231</sup>, Chiara Spertilli<sup>231</sup>, Marco Feri<sup>232</sup>, Alice Donati<sup>232</sup>, Raffaele Scala<sup>233</sup>, Luca Guidelli<sup>233</sup>, Genni Spargi<sup>234</sup>, Marta Corridi<sup>234</sup>, Cesira Nencioni<sup>235</sup>, Leonardo Croci<sup>235</sup>, Gian Piero Caldarelli<sup>236</sup>, Maurizio Spagnesi<sup>237</sup>, Paolo Piacentini<sup>237</sup>, Maria

Bandini<sup>237</sup>, Elena Desanctis<sup>237</sup>, Silvia Cappelli<sup>237</sup>, Anna Canaccini<sup>238</sup>, Agnese Verzuri<sup>238</sup>, Valentina Anemoli<sup>238</sup>, Antonella D'Arminio Monforte<sup>239</sup>, Esther Merlini<sup>239</sup>, Mario U. Mondelli<sup>240,241</sup>, Stefania Mantovani<sup>240</sup>, Serena Ludovisi<sup>240,241</sup>, Massimo Girardis<sup>242</sup>, Sophie Venturelli<sup>242</sup>, Marco Sita<sup>242</sup>, Andrea Antinori<sup>243</sup>, Alessandra Vergori<sup>243</sup>, Stefano Rusconi<sup>244,245</sup>, Matteo Siano<sup>245</sup>, Arianna Gabrieli<sup>245</sup>, Agostino Riva<sup>244,245</sup>, Daniela Francisci<sup>246</sup>, Elisabetta Schiaroli<sup>246</sup>, Pier Giorgio Scotton<sup>247</sup>, Francesca Andretta<sup>247</sup>, Sandro Panese<sup>248</sup>, Renzo Scaggiante<sup>249</sup>, Francesca Gatti<sup>249</sup>, Saverio Giuseppe Parisi<sup>250</sup>, Francesco Castelli<sup>251</sup>, Maria Eugenia Quiros-Roldan<sup>251</sup>, Paola Magro<sup>251</sup>, Isabella Zanella<sup>252</sup>, Matteo Della Monica<sup>253</sup>, Carmelo Piscopo<sup>253</sup>, Mario Capasso<sup>254,255,256</sup>, Roberta Russo<sup>254,255</sup>, Immacolata Andolfo<sup>254,255</sup>, Achille Iolascon<sup>254,255</sup>, Giuseppe Fiorentino<sup>257</sup>, Massimo Carella<sup>258</sup>, Marco Castori<sup>258</sup>, Giuseppe Merla<sup>258</sup>, Filippo Aucella<sup>259</sup>, Pamela Raggi<sup>260</sup>, Carmen Marciano<sup>260</sup>, Rita Perna<sup>260</sup>, Matteo Bassetti<sup>261,262</sup>, Antonio Di Biagio<sup>262</sup>, Maurizio Sanguinetti<sup>263,264</sup>, Luca Masucci<sup>263,264</sup>, Serafina Valente<sup>265</sup>, Marco Mandalà<sup>266</sup>, Alessia Giorli<sup>266</sup>, Lorenzo Salerni<sup>266</sup>, Patrizia Zucchi<sup>267</sup>, Pierpaolo Parravicini<sup>267</sup>, Elisabetta Menatti<sup>268</sup>, Stefano Baratti<sup>269</sup>, Tullio Trotta<sup>270</sup>, Ferdinando Giannattasio<sup>270</sup>, Gabriella Coiro<sup>270</sup>, Fabio Lena<sup>271</sup>, Domenico A. Coviello<sup>272</sup>, Cristina Mussini<sup>273</sup>, Giancarlo Bosio<sup>274</sup>, Enrico Martinelli<sup>274</sup>, Sandro Mancarella<sup>275</sup>, Luisa Tavecchia<sup>275</sup>, Lia Crotti<sup>276,277</sup>, Nicola Picchiotti<sup>278,279</sup>, Marco Gori<sup>278,280</sup>, Chiara Gabbi<sup>281</sup>, Maurizio Sanarico<sup>282</sup>, Stefano Ceri<sup>283</sup>, Pietro Pinoli<sup>283</sup>, Francesco Raimondi<sup>284</sup>, Filippo Biscarini<sup>285</sup>, Alessandra Stella<sup>285</sup>.

<sup>31</sup>Medical Genetics, University of Siena, Italy

<sup>32</sup>Genetica Medica, Azienda Ospedaliero-Universitaria Senese, Italy

<sup>225</sup>Department of Medical Biotechnologies, University of Siena, Italy

<sup>226</sup>Dept of Specialized and Internal Medicine, Tropical and Infectious Diseases Unit

<sup>227</sup>Unit of Respiratory Diseases and Lung Transplantation, Department of Internal and Specialist Medicine, University of Siena

<sup>228</sup>Dept of Emergency and Urgency, Medicine, Surgery and Neurosciences, Unit of Intensive Care Medicine, Siena University Hospital, Italy

<sup>229</sup>Department of Medical, Surgical and Neurosciences and Radiological Sciences, Unit of Diagnostic Imaging, University of Siena

<sup>230</sup>Rheumatology Unit, Department of Medicine, Surgery and Neurosciences, University of Siena, Policlinico Le Scotte, Italy

<sup>231</sup>Department of Specialized and Internal Medicine, Infectious Diseases Unit, San Donato Hospital Arezzo, Italy

<sup>232</sup>Dept of Emergency, Anesthesia Unit, San Donato Hospital, Arezzo, Italy

<sup>233</sup>Department of Specialized and Internal Medicine, Pneumology Unit and UTIP, San Donato Hospital, Arezzo, Italy

<sup>234</sup>Department of Emergency, Anesthesia Unit, Misericordia Hospital, Grosseto, Italy

<sup>235</sup>Department of Specialized and Internal Medicine, Infectious Diseases Unit, Misericordia Hospital, Grosseto, Italy

<sup>236</sup>Clinical Chemical Analysis Laboratory, Misericordia Hospital, Grosseto, Italy

<sup>237</sup>Department of Preventive Medicine, Azienda USL Toscana Sud Est, Italy

<sup>238</sup>Territorial Scientific Technician Department, Azienda USL Toscana Sud Est, Italy

<sup>239</sup>Department of Health Sciences, Clinic of Infectious Diseases, ASST Santi Paolo e Carlo, University of Milan, Italy

<sup>240</sup>Division of Infectious Diseases and Immunology, Fondazione IRCCS Policlinico San Matteo, Pavia, Italy

<sup>241</sup>Department of Internal Medicine and Therapeutics, University of Pavia, Italy

<sup>242</sup>Department of Anesthesia and Intensive Care, University of Modena and Reggio Emilia, Modena, Italy

<sup>243</sup>HIV/AIDS Department, National Institute for Infectious Diseases, IRCCS, Lazzaro Spallanzani, Rome, Italy

<sup>244</sup>III Infectious Diseases Unit, ASST-FBF-Sacco, Milan, Italy

<sup>245</sup>Department of Biomedical and Clinical Sciences Luigi Sacco, University of Milan, Milan, Italy

<sup>246</sup>Infectious Diseases Clinic, Department of Medicine 2, Azienda Ospedaliera di Perugia and University of Perugia, Santa Maria Hospital, Perugia, Italy

<sup>247</sup>Department of Infectious Diseases, Treviso Hospital, Local Health Unit 2 Marca Trevigiana, Treviso, Italy

<sup>248</sup>Clinical Infectious Diseases, Mestre Hospital, Venezia, Italy

<sup>249</sup>Infectious Diseases Clinic, ULSS1, Belluno, Italy

<sup>250</sup>Department of Molecular Medicine, University of Padova, Italy

<sup>251</sup>Department of Infectious and Tropical Diseases, University of Brescia and ASST Spedali Civili Hospital, Brescia, Italy

<sup>252</sup>Department of Molecular and Translational Medicine, University of Brescia, Italy; Clinical Chemistry Laboratory, Cytogenetics and Molecular Genetics Section, Diagnostic Department, ASST Spedali Civili di Brescia, Italy

<sup>253</sup>Medical Genetics and Laboratory of Medical Genetics Unit, A.O.R.N. "Antonio Cardarelli", Naples, Italy

<sup>254</sup>Department of Molecular Medicine and Medical Biotechnology, University of Naples Federico II, Naples, Italy



- <sup>255</sup>CEINGE Biotechnologie Avanzate, Naples, Italy
- <sup>256</sup>IRCCS SDN, Naples, Italy
- <sup>257</sup>Unit of Respiratory Physiopathology, AORN dei Colli Monaldi Hospital, Naples, Italy
- <sup>258</sup>Division of Medical Genetics, Fondazione IRCCS Casa Sollievo della Sofferenza Hospital, San Giovanni Rotondo, Italy
- <sup>259</sup>Department of Medical Sciences, Fondazione IRCCS Casa Sollievo della Sofferenza Hospital, San Giovanni Rotondo, Italy
- <sup>260</sup>Clinical Trial Office, Fondazione IRCCS Casa Sollievo della Sofferenza Hospital, San Giovanni Rotondo, Italy
- <sup>261</sup>Department of Health Sciences, University of Genova, Genova, Italy
- <sup>262</sup>Infectious Diseases Clinic, Policlinico San Martino Hospital, IRCCS for Cancer Research Genova, Italy
- <sup>263</sup>Microbiology, Fondazione Policlinico Universitario Agostino Gemelli IRCCS, Catholic University of Medicine, Rome, Italy
- <sup>264</sup>Department of Laboratory Sciences and Infectious Diseases, Fondazione Policlinico Universitario A. Gemelli IRCCS, Rome, Italy
- <sup>265</sup>Department of Cardiovascular Diseases, University of Siena, Siena, Italy
- <sup>266</sup>Otolaryngology Unit, University of Siena, Italy
- <sup>267</sup>Department of Internal Medicine, ASST Valtellina e Alto Lario, Sondrio, Italy
- <sup>268</sup>Study Coordinator Oncologia Medica e Ufficio Flussi, Sondrio, Italy
- <sup>269</sup>Department of Infectious and Tropical Diseases, University of Padova, Padova, Italy
- <sup>270</sup>First Aid Department, Luigi Curto Hospital, Polla, Salerno, Italy
- <sup>271</sup>Local Health Unit-Pharmaceutical Department of Grosseto, Toscana Sud Est Local Health Unit, Grosseto, Italy
- <sup>272</sup>U.O.C. Laboratorio di Genetica Umana, IRCCS Istituto G. Gaslini, Genova, Italy
- <sup>273</sup>Infectious Diseases Clinics, University of Modena and Reggio Emilia, Modena, Italy
- <sup>274</sup>Department of Respiratory Diseases, Azienda Ospedaliera di Cremona, Cremona, Italy
- <sup>275</sup>U.O.C. Medicina, ASST Nord Milano, Ospedale Bassini, Cinisello Balsamo (MI), Italy
- <sup>276</sup>Istituto Auxologico Italiano, IRCCS, San Luca Hospital, Milan, Italy
- <sup>277</sup>Department of Medicine and Surgery, University of Milano-Bicocca, Milan, Italy
- <sup>278</sup>University of Siena, DIISM-SAILAB, Siena, Italy
- <sup>279</sup>Department of Mathematics, University of Pavia, Pavia, Italy
- <sup>280</sup>University Cote d'Azur, Inria, CNRS, I3S, Maasai
- <sup>281</sup>Independent Medical Scientist, Milan, Italy
- <sup>282</sup>Independent Data Scientist, Milan, Italy
- <sup>283</sup>Department of Electronics, Information and Bioengineering (DEIB), Politecnico di Milano, Milano, Italy
- <sup>284</sup>Scuola Normale Superiore, Pisa, Italy
- <sup>285</sup>CNR-Consiglio Nazionale delle Ricerche, Istituto di Biologia e Biotecnologia Agraria (IBBA), Milano, Italy. Currently seconded at the ERCEA (European Research Council Executive Agency), Bruxelles, Belgium.

### **23andMe: Source data for meta-analysis**

We thank the 23andMe research participants who made this study possible. We would also like to thank Altovise Ewing, Aaron Petrakovitz, Anne Park, Anne Silk, Aushawna Collins, Becky Macintosh, Carolyn Kao, Courtney Ball, Christine Pai, David Hinds, Devyn Parry, Elo Ratcliff, Emily Bullis, Eric Hall, Farwa Alam, Jacquie Haggarty, Jess Christenson, Jim Lawrence, Jimmy Chau, Josie Shaw, Joe Cackler, Karl Heilbron, Katelyn Kukar, Katie Watson, Marianna Frendo, Olivia Valenti, Ryan Workman, Rachel Lopatin, Robert Bell, Rose Eckert, Sam Rodgers, Sarah Rys, Shawna Averbeck, Shirin Fuller, Vanessa Lane, and Yunxuan Jiang for contributions and insights.

We also thank the 23andMe Research Team: Barry Hicks, Chao Tian, Devika Dhamija, Elizabeth Babalola, Elizabeth S. Noblin, Ethan M. Jewett, G. David Poznik, Gabriel Cuellar Partida, Jared O'Connell, Jingchunzi Shi, Joanna L. Mountain, Joyce Y. Tung, Katarzyna Bryc, Karen E. Huber, Keng-Han Lin, Kimberly F. McManus, Kipper Fletez-Brant, Marie K. Luff, Matthew H. McIntyre, Maya Lowe, Meghan E. Moreno, Peter Wilton, Pierre Fontanillas, Priyanka Nandakumar, Sahar V. Mozaffari, Sarah L. Elson, Sayantan Das, Steven J. Micheletti, Suyash Shringarpure, Vinh Tran, Wei Wang, Will Freyman, and Xin Wang.

Members of the 23andMe COVID-19 Team are: Adam Auton, Adrian Chubb, Alison Fitch, Alison Kung, Amanda Altman, Andy Kill, Anjali Shastri, Catherine Weldon, Chelsea Ye, Daniella Coker, Janie Shelton, Jason Tan, Jeff Pollard, Jennifer McCreight, Jess Bielenberg, John Matthews, Johnny Lee, Lindsey Tran, Michelle Agee, Monica Royce, Nate Tang, Pooja Gandhi, Raffaello d'Amore, Ruth Tennen, Scott Dvorak, Scott Hadly, Stella Aslibekyan, Sungmin Park, Taylor Morrow, Teresa Filshtein Sonmez, Trung Le, and Yiwen Zheng.

## Covid-19 Host Genetics Initiative

### Source data for B2 (hospitalised patient) comparison

Andrea Ganna, Andre Franke, Alessandra Renieri, Alexandre Pereira, Patrick Sulem, Kári Stefánsson, Benjamin Neale, Migeotte Isabelle, David van Heel, Aarno Palotie, Mark Daly

### Covid-19 HGI contributors

Adam Butterworth, Adeline Busson, Agustín Albillos, Aldo Cordova Palomera, Alessandra Renieri, Alex Stuckey, Alexander Ioannidis, Alexandre Belisle, Alexandre Bolze, Alexandre C Pereira, Alfredo Brusco, Alicia R. Martin, Amy Trankiem, Anastasia Lucas, Andre Franke, Andrea Ganna, Andy Beck, Ann Woolley, Anna Bernasconi, Anna C Need, Anna Maria Pinto, Anna Rita Giliberti, Anne Marie O'Connell, Annique Claringbould, Anurag Verma, Archana Raja, Archie Campbell, Arden Moscati, Areti Papadopoulou, Asgeir Haraldsson, Athanasios Kousathanas, Augusto Rendon, Ben Neale, Benjamin Pinsky, Beth Karlson, Bhavi Trivedi, Binglan Li, Biswarup Ghosh, Björn Jensen, Bogdan Pasaniuc, Branka Vulesevic, Brent Richards, Brooke Wolford, Brooke Wolford, Bruno Pichon, Carlo Maj, Carlos Bustamante, Caroline Hayward, Cathy Tralau-Stewart, Chang Kyung Kang, Charlotte Guzman, Chiara Fallerini, Chloe Fawns-Ritchie, Chris A Odhams, Chris C A Spencer, Christiaan de Leeuw, Christine Stevens, Christopher DeBoever, Christopher Griffiths, Christopher Hughes, Christopher J O'Donnell, Cinthia E Jannes, Claire Churchhouse, Clara Lehmann, Cynthia M Bulik, Dadi Helgason, Dan Mason, Dan Rhodes, Daniel Auld, Daniel J Wilson, Daniel Rader, Daniele Prati, Danielle Henry, Danielle Posthuma, Daniel F Gudbjartsson, Dave Roberts, David A van Heel, David Amar, David Bernardo, David Ellighaus, David H Wyllie, David Jimenez-Morales, David Porteous, David R. Morrison, David van Heel, Denis Franchimont, Dorota Pasko, Drew Altshul, Duncan S. Palmer, Eco de Geus, Edouard Louis, Eirini Marouli, Elias S Eythorsson, Elisa Benetti, Elisa Frullanti, Elizabeth G. Atkinson, Elizabeth T. Cirulli, Emanuele Di Angelantonio, Emil Uffelmann, Emily Wong, Emma Perez, Emmanuelle Marques, Eric Kerchberger, Erin Smith, Erwin Schurr, Esteban Lopera, Eu Suk Kim, Euan Ashley, Eun-Jeong Joo, Federico Zara, Finngen, Francesca Fava, Francesca Mari, Francisco Tanudjaja, Francoise Wilkin, Frank R Wendt, Frauke Degenhardt, G. Mark Lathrop, Gardar Sveinbjornsson, Genomics England Research Consortium, Georgia Chan, Gina Peloso, Gita Pathak, Global Science Experimental Data Hub Center (GSDC), Gudmundur L Norddahl, Guillaume Butler-Laporte, Guillaume Smits, Hakon Jonsson, Hamdi Mbarek, Han-Na Kim, Hannah de Jong, Hilary C Martin, Hilary Finucane, Hilma Holm, Hong Bin Kim, Huy Nguyen, Hyo-Jung Lee, Hyung-Lae Kim, Ingileif Jonsdottir, Ingo Kurth, Isabell Pink, Isabelle Migeotte, Isabelle Vandernoot, Iva Neveux, J Michael Gaziano, J. Brent Richards, Jacob Armstrong, James Meigs, James Priest, James T. Lu, Jan Rybniker, Janine Altmüller, Javier Fernández, Jean-Christophe Goffard, Jeanne Savage, Jennifer E Huffman, Jeong Su Park, Jesus M. Banales, Jiannis Ragoussis, Jimmy M. Ramirez III, Jin Chung, Jing Hua Zhao, Jiongming Wang, Johannes R Hov, John Danesh, John Gorzynski, John Wright, Jona Saemundsdottir, Jonathan Afilalo, Jongtak Jung, Jordan Smoller, Jose E Krieger, Josep Mercader, Joseph J. Grzymski, Jouke-Jan Hottenga, Judy H. Cho, Juha Karjalainen, Julia Fazaal, Julia Schröder, Kangbuk Samsung Cohort Study (KSCS), Kangcheng Hou, Karen A Hunt, Karen Dalton, Kari Stefansson, Karolina Chwialkowska, Kate Balaconis, Kelly Cho, Kelly M. Schiabor Barrett, Kerstin U. Ludwig, Kevin Liao, Konrad J. Karczewski, Konrad Karczewski, Korea Research Environment Open Network (KREONET), Kumar Veerapen, Kyoung-Ho Song, Kyoung-Un Park, Laetitia Laurent, Laith J. Abu Raddad, Lea Davis, Les Biesecker, Lisa Knopp, Loic Yengo, Louis Petitjean, Loukas Moutsianas, Luca Valenti, Lude Franke, Luis Bujanda, Manuel Martínez-Bueno, Manuel Rivas, Manuel Romero Gomez, Marc Afilalo, Margherita Baldassarri, Margherita Francescato, Mari Niemi, Maria Buti, Marike Boezen, Mark Caulfield, Mark Daly, Markus Cornberg, Markus M. Nöthen, Marta E. Alarcón-Riquelme, Marylyn Ritchie, Masahiro Kanai, Masahiro Kanai, Matthew Solomonson, Matthew Wheeler, Mattia Cordioli, Max Augustin, Meike Bartels, Meriem Bouab, Michael Chapman, Michael Dreher, Michel G Nivard, Mikael Landen, Mirella Bruttini, Nam-Jong Paik, Nancy Pedersen, Naomi Wray, Nardin Rezk, Nicholas Mancuso, Nick Watkins, Nicky Tiembe, Nicole L. Washington, Nikolas Baya, Nikolaus Marx, Nils Koelling, Nofar Kimchi, Noor Mamlouk, Olivier Delaneau, Olumide Adeleye, Pall Melsted, Pasquale Striano, Patrick Deelen, Patrick Deelen, Patrick Sulem, Patrick Turley, Pedro Orozco del Peno, Peter Visscher, Philip Jansen, Philip Tsao, Philipp Schommers, Pierre Lepage, Pietro Invernizzi, Prabhu Arumugam, Pyoeng Gyun Choe, Qinqin Huang, Rachel Liao, Radja Badji, Ragnar F Ingvarsson, Raymond K. Walters, Renato Polimanti, Richard C Trembath, Richard H Scott, Robert Green, Robert Warmerdam, Rosanna Asselta, Rossella Tita, Runolfur Palsson, Ruth J.F. Loos, Said Ismail, Sam Bryant, Sandor Szalma, Sara Amtrano, Sarah Finer, Scott Weiss, Sebastian Zöllner, Selina Rolker, Seungho Ryu, Severine Vermeire, Shaun Dabe, Shawn Murphy, Shyamalika Gopalan, Silvia Rojo Rello, Simon White, Simone Furini, Simone Rubinacci, Sinyoung Ham, Sonja Volland, Soo-kyung Park, Souad Rahmouni, Stefano Ceri, Stefano Duga, Stephen Riffle, Sue Slaugenhaupt, Sulggi Lee, Sumatra Muraldihar, Susanna Croci, Tala Abdullah, Thomas Eggermann, Thomas Illig, Thomas Ocroft, Tom H Karlsen, Tomoko Nakanishi, Torsten

Feldt, Trine Folseraas, Unnur Thorsteinsdottir, Valentino Floriana, Verena Keitel, Vicki Parikh, Vijay Sankaran, Vincent Mooser, Vincenzo Forgetta, Wadha Al-Muftah, Wei Zhou, Willem Ouwehand, Xavier Peyrassol, Xueqing Wang, Yan Sun, Yan Wei Lim, Yasser Al-Sarraj, Yen-Chen Anne Feng, Yoosoo Chang, Yosuke Tanigawa, Youssef Bouysran, Yuk-Lam Ho, Zaman Afrasiabi, Zeyun Lu

**BRACOVID**

Alexandre C Pereira<sup>1</sup>, Jose E Krieger<sup>1</sup>, Emmanuelle Marques<sup>1</sup>, Cinthia E Jannes<sup>1</sup>.

1. Heart Institute, University of Sao Paulo, Brazil

# References

1. English indices of deprivation 2019. *GOV.UK*
2. Parkinson, N., Rodgers, N., Fourman, M.H., Wang, B., Zechner, M., Swets, M., Millar, J.E., Law, A., Russell, C., Baillie, J.K. & Clohisey, S. Systematic review and meta-analysis identifies potential host therapeutic targets in COVID-19. *medRxiv* 2020.08.27.20182238(2020).doi:[10.1101/2020.08.27.20182238](https://doi.org/10.1101/2020.08.27.20182238)
3. Luca, G.D., Cavalli, G., Campochiaro, C., Della-Torre, E., Angelillo, P., Tomelleri, A., Boffini, N., Tentori, S., Mette, F., Farina, N., Rovere-Querini, P., Ruggeri, A., D'Aliberti, T., Scarpellini, P., Landoni, G., Cobelli, F.D., Paolini, J.F., Zangrillo, A., Tresoldi, M., Trapnell, B.C., Ciceri, F. & Dagna, L. GM-CSF blockade with mavrilimumab in severe COVID-19 pneumonia and systemic hyperinflammation: A single-centre, prospective cohort study. *The Lancet Rheumatology* **2**, e465–e473(2020).
4. Lang, F.M., Lee, K.M.-C., Teijaro, J.R., Becher, B. & Hamilton, J.A. GM-csf-based treatments in covid-19: Reconciling opposing therapeutic approaches. *Nature reviews. Immunology* **20**, 507–514(2020).
5. Liu, C., Brunn, A. von & Zhu, D. Cyclophilin a and cd147: Novel therapeutic targets for the treatment of covid-19. *Medicine in drug discovery* **7**, 100056(2020).
6. Li, B., Clohisey, S.M., Chia, B.S., Wang, B., Cui, A., Eisenhaure, T., Schweitzer, L.D., Hoover, P., Parkinson, N.J., Nachshon, A., Smith, N., Regan, T., Farr, D., Gutmann, M.U., Bukhari, S.I., Law, A., Sangesland, M., Gat-Viks, I., Digard, P., Vasudevan, S., Lingwood, D., Dockrell, D.H., Doench, J.G., Baillie, J.K. & Hacohen, N. Genome-wide CRISPR screen identifies host dependency factors for influenza A virus infection. *Nature Communications* **11**, 164(2020).
7. Zhu, Z., Zheng, Z., Zhang, F., Wu, Y., Trzaskowski, M., Maier, R., Robinson, M.R., McGrath, J.J., Visscher, P.M., Wray, N.R. & Yang, J. Causal associations between risk factors and common diseases inferred from gwas summary data. *Nature communications* **9**, 224(2018).
8. Vösa, U., Claringbould, A., Westra, H.-J., Bonder, M.J., Deelen, P., Zeng, B., Kirsten, H., Saha, A., Kreuzhuber, R., Kasela, S., Pervjakova, N., Alvaes, I., Fave, M.-J., Agbessi, M., Christiansen, M., Jansen, R., Seppälä, I., Tong, L., Teumer, A., Schramm, K., Hemani, G., Verlouw, J., Yaghootkar, H., Sönmez, R., Brown, A., Kukushkina, V., Kalnapenkis, A., Rüeger, S., Porcu, E., Kronberg-Guzman, J., Kettunen, J., Powell, J., Lee, B., Zhang, F., Arindrarto, W., Beutner, F., Consortium, B., Brugge, H., Consortium, i., Dmitreva, J., Elansary, M., Fairfax, B.P., Georges, M., Heijmans, B.T., Kähönen, M., Kim, Y., Knight, J.C., Kovacs, P., Krohn, K., Li, S., Loeffler, M., Marigorta, U.M., Mei, H., Momozawa, Y., Müller-Nurasyid, M., Nauck, M., Nivard, M., Penninx, B., Pritchard, J., Raitakari, O., Rotzchke, O., Slagboom, E.P., Stehouwer, C.D.A., Stumvoll, M., Sullivan, P., Hoen, P.A.C., Thiery, J., Tönjes, A., Dongen, J. van, Iterson, M. van, Veldink, J., Völker, U., Wijmenga, C., Swertz, M., Andiappan, A., Montgomery, G.W., Ripatti, S., Perola, M., Kutalik, Z., Dermitzakis, E., Bergmann, S., Frayling, T., Meurs, J. van, Prokisch, H., Ahsan, H., Pierce, B., Lehtimäki, T., Boomsma, D., Psaty, B.M., Gharib, S.A., Awadalla, P., Milani, L., Ouwehand, W., Downes, K., Stegle, O., Battle, A., Yang, J., Visscher, P.M., Scholz, M., Gibson, G., Esko, T. & Franke, L. Unraveling the polygenic architecture of complex traits using blood eQTL metaanalysis. *bioRxiv* 447367(2018).doi:[10.1101/447367](https://doi.org/10.1101/447367)
9. Leeuw, C.A. de, Mooij, J.M., Heskes, T. & Posthuma, D. MAGMA: Generalized gene-set analysis of gwas data. *PLoS computational biology* **11**, e1004219(2015).
